# Supplementary material
Source: ML conference proceedings conference paper supplement (https://openreview.net/forum?id=IqlKCjLyYd)
Supplement: supplementary_material [file unlabelled_quality_legend.pdf › Codes/Figure_code/figures/unlabelled_quality_legend.pdf]

■ ■ ■ expert   ■ SafeDICE   ■ ILID   ■ ReCOIL   ■ ContraDICE
