# Supplementary material
Source: ML conference proceedings conference paper supplement (https://openreview.net/forum?id=IqlKCjLyYd)

# ANT (MEDIUM + EXPERT)

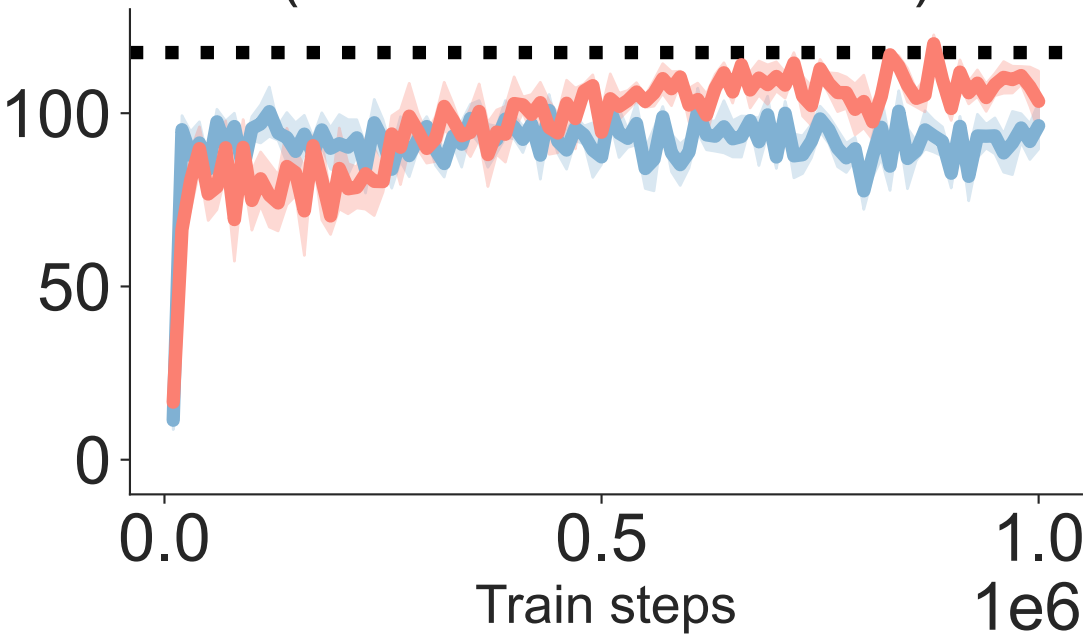

Supplement: supplementary_material [file adv_ablation_ant_medium_expert.pdf › Codes/Figure_code/figures/adv_ablation_ant_medium_expert.pdf]

# ANT (RANDOM + EXPERT)

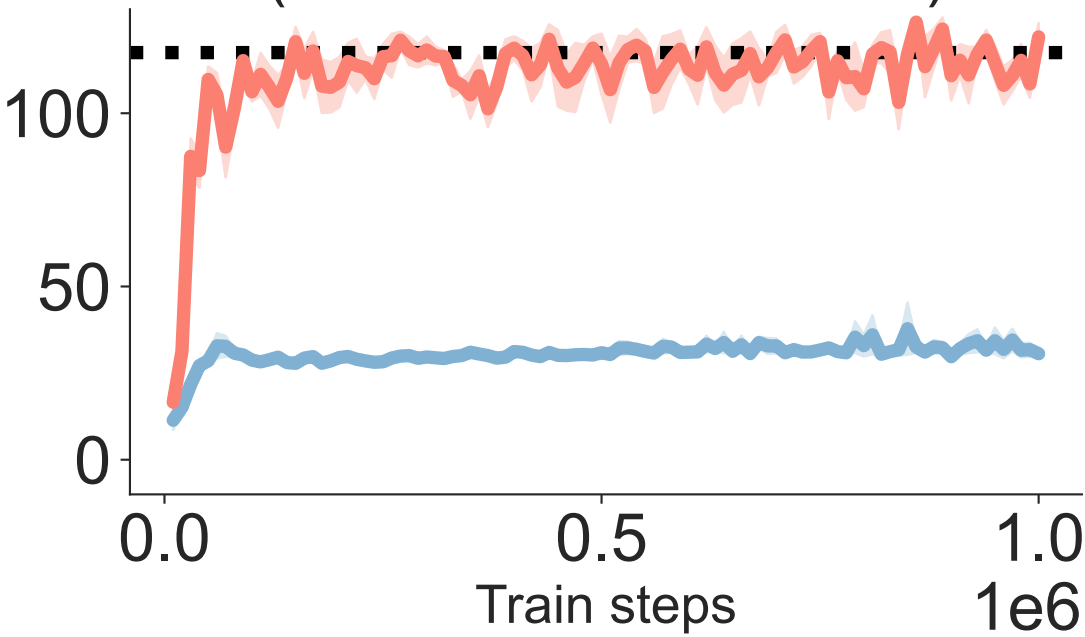

Supplement: supplementary_material [file adv_ablation_ant_random_expert.pdf › Codes/Figure_code/figures/adv_ablation_ant_random_expert.pdf]

# DOOR (CLONED + EXPERT)

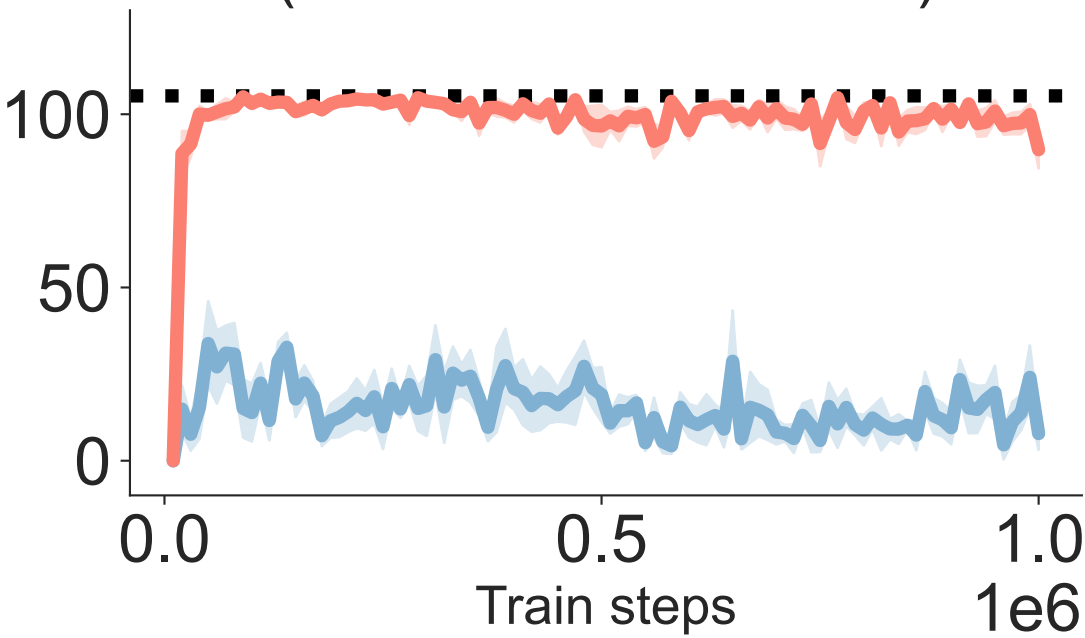

Supplement: supplementary_material [file adv_ablation_door_cloned_expert.pdf › Codes/Figure_code/figures/adv_ablation_door_cloned_expert.pdf]

# DOOR (HUMAN + EXPERT)

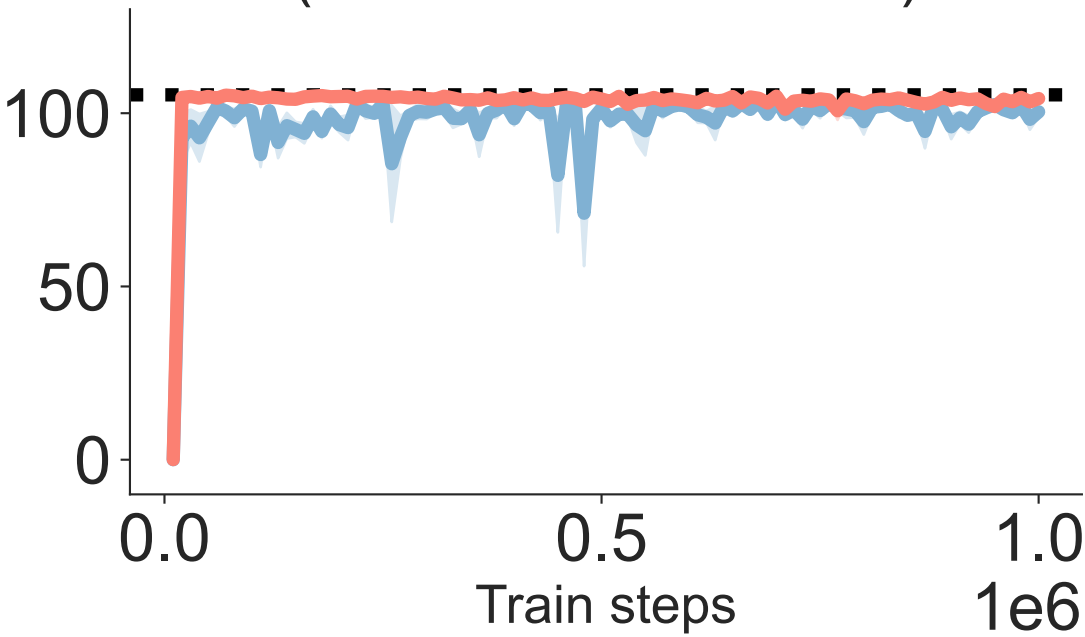

Supplement: supplementary_material [file adv_ablation_door_human_expert.pdf › Codes/Figure_code/figures/adv_ablation_door_human_expert.pdf]

# CHEETAH (MEDIUM + EXPERT)

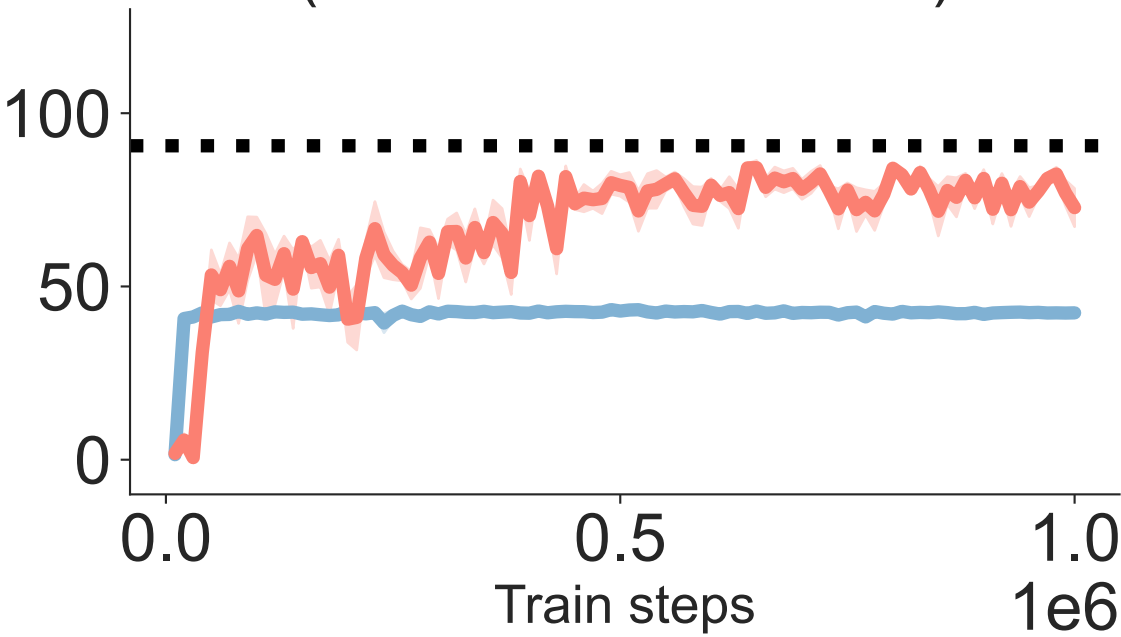

Supplement: supplementary_material [file adv_ablation_halfcheetah_medium_expert.pdf › Codes/Figure_code/figures/adv_ablation_halfcheetah_medium_expert.pdf]

# CHEETAH (RANDOM + EXPERT)

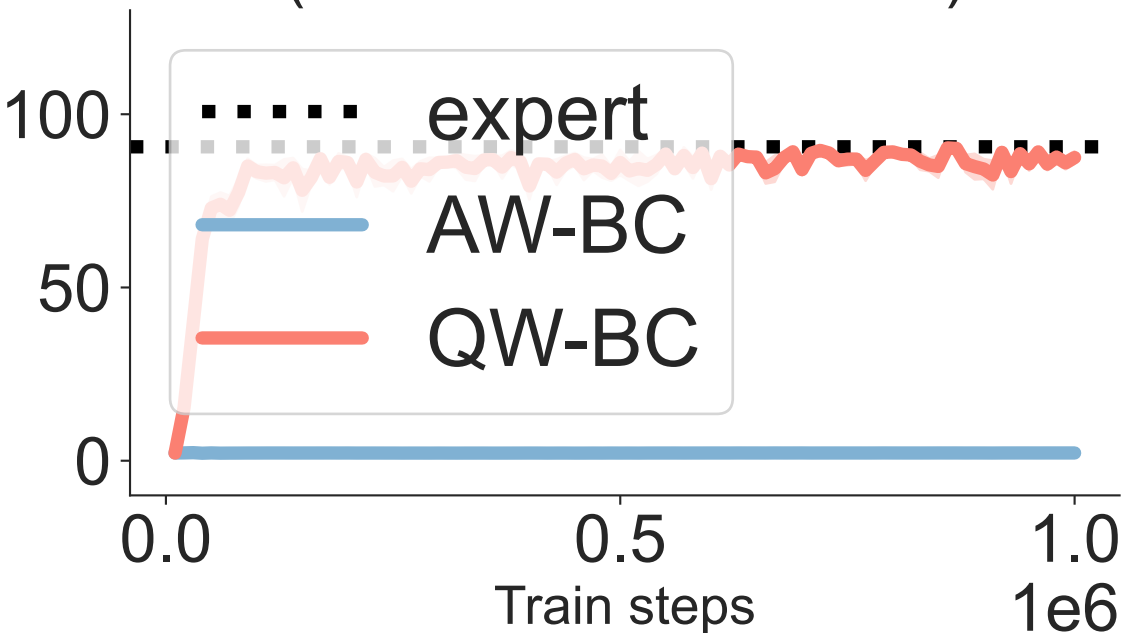

Supplement: supplementary_material [file adv_ablation_halfcheetah_random_expert.pdf › Codes/Figure_code/figures/adv_ablation_halfcheetah_random_expert.pdf]

# HAMMER (CLONED + EXPERT)

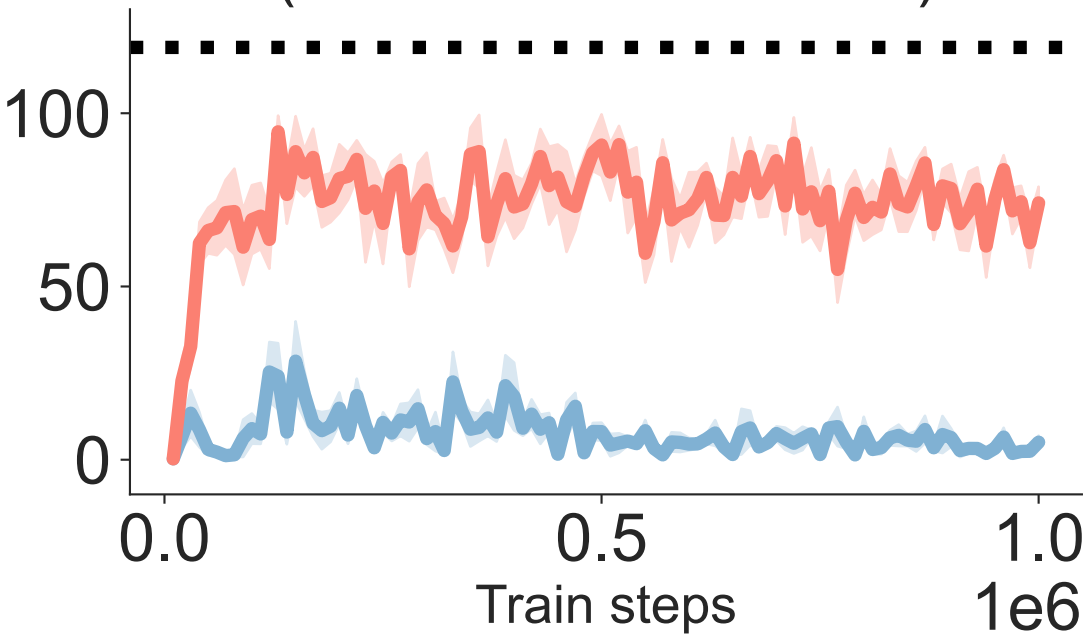

Supplement: supplementary_material [file adv_ablation_hammer_cloned_expert.pdf › Codes/Figure_code/figures/adv_ablation_hammer_cloned_expert.pdf]

# HAMMER (HUMAN + EXPERT)

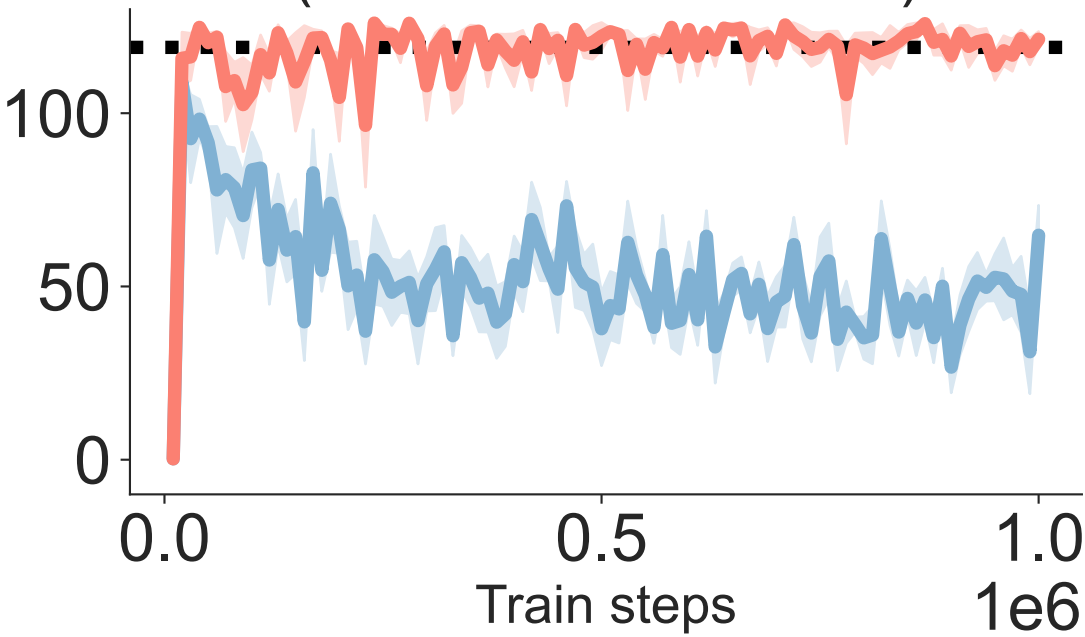

Supplement: supplementary_material [file adv_ablation_hammer_human_expert.pdf › Codes/Figure_code/figures/adv_ablation_hammer_human_expert.pdf]

# HOPPER (MEDIUM + EXPERT)

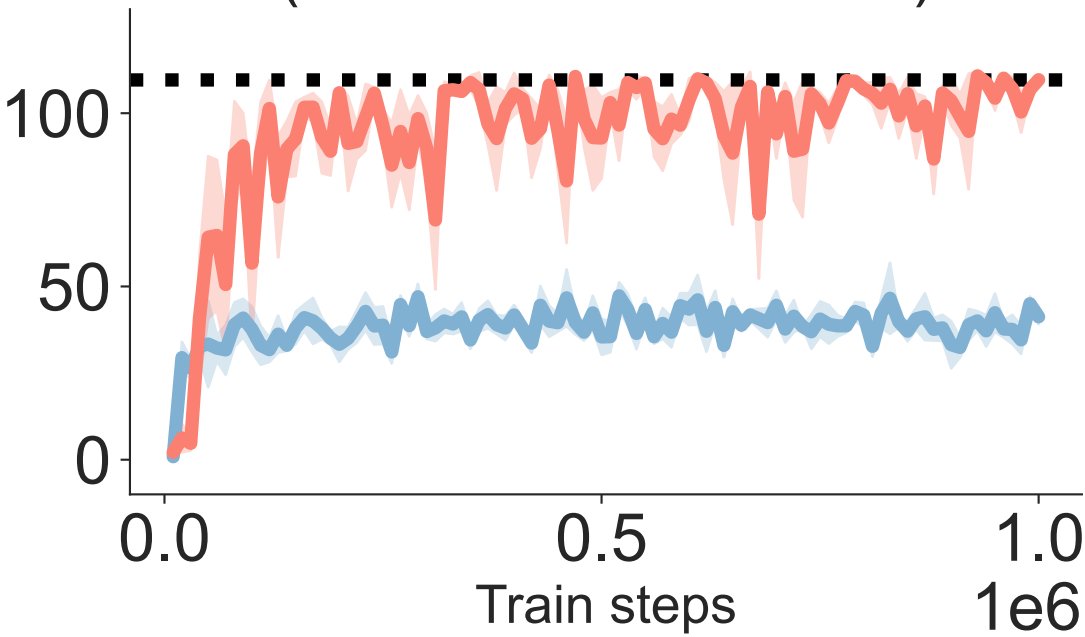

Supplement: supplementary_material [file adv_ablation_hopper_medium_expert.pdf › Codes/Figure_code/figures/adv_ablation_hopper_medium_expert.pdf]

# HOPPER (RANDOM + EXPERT)

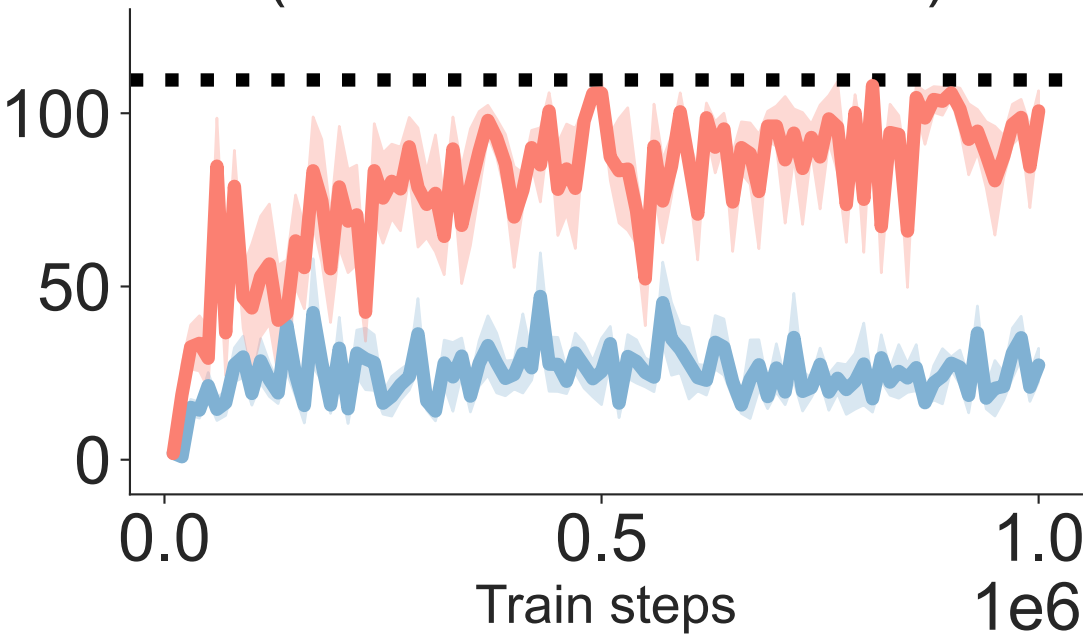

Supplement: supplementary_material [file adv_ablation_hopper_random_expert.pdf › Codes/Figure_code/figures/adv_ablation_hopper_random_expert.pdf]

# PEN (CLONED + EXPERT)

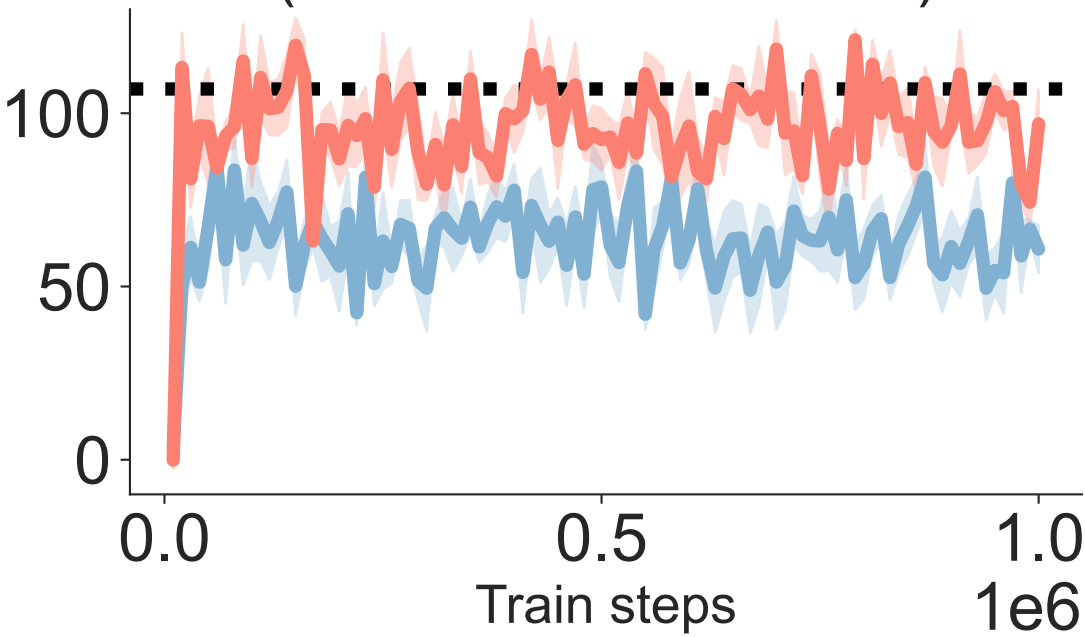

Supplement: supplementary_material [file adv_ablation_pen_cloned_expert.pdf › Codes/Figure_code/figures/adv_ablation_pen_cloned_expert.pdf]

# PEN (HUMAN + EXPERT)

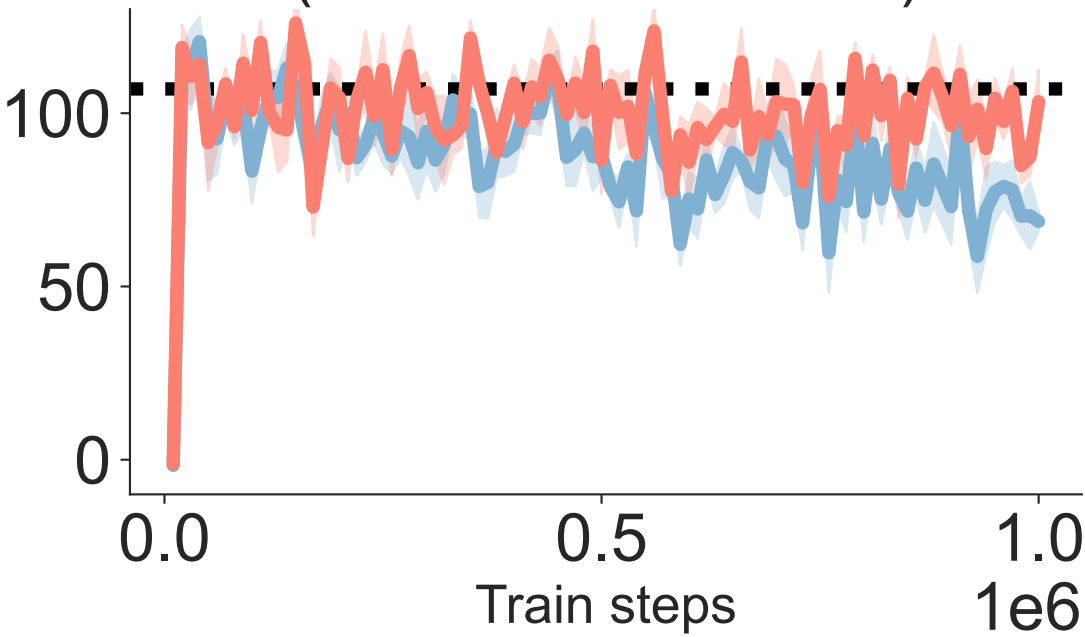

Supplement: supplementary_material [file adv_ablation_pen_human_expert.pdf › Codes/Figure_code/figures/adv_ablation_pen_human_expert.pdf]

# RELOCATE (CLONED + EXPERT)

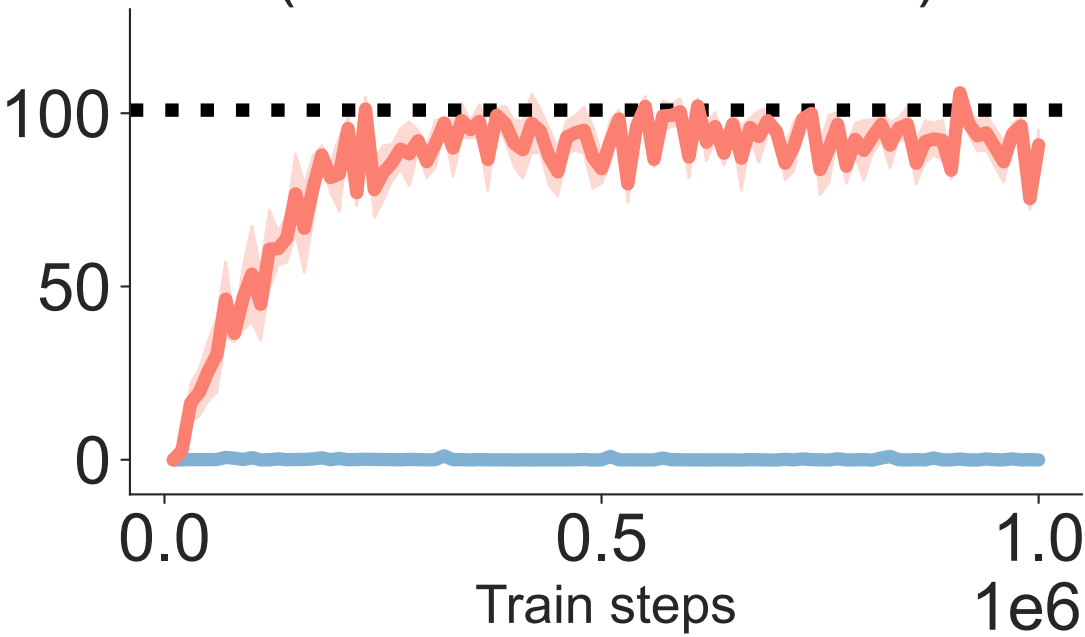

Supplement: supplementary_material [file adv_ablation_relocate_cloned_expert.pdf › Codes/Figure_code/figures/adv_ablation_relocate_cloned_expert.pdf]

# RELOCATE (HUMAN + EXPERT)

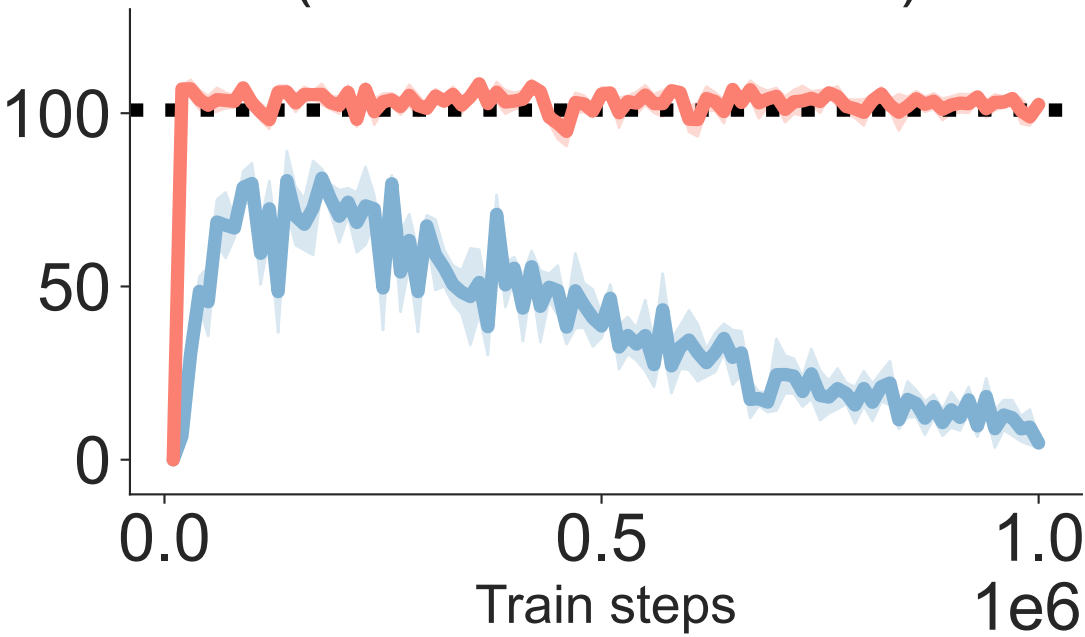

Supplement: supplementary_material [file adv_ablation_relocate_human_expert.pdf › Codes/Figure_code/figures/adv_ablation_relocate_human_expert.pdf]

# WALKER (MEDIUM + EXPERT)

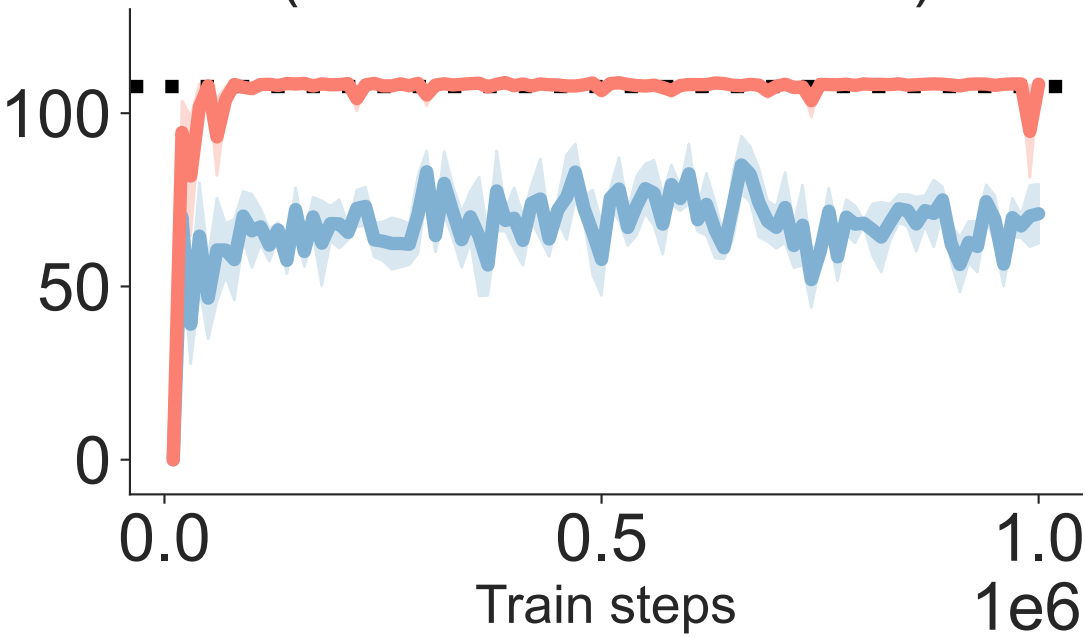

Supplement: supplementary_material [file adv_ablation_walker2d_medium_expert.pdf › Codes/Figure_code/figures/adv_ablation_walker2d_medium_expert.pdf]

# WALKER (RANDOM + EXPERT)

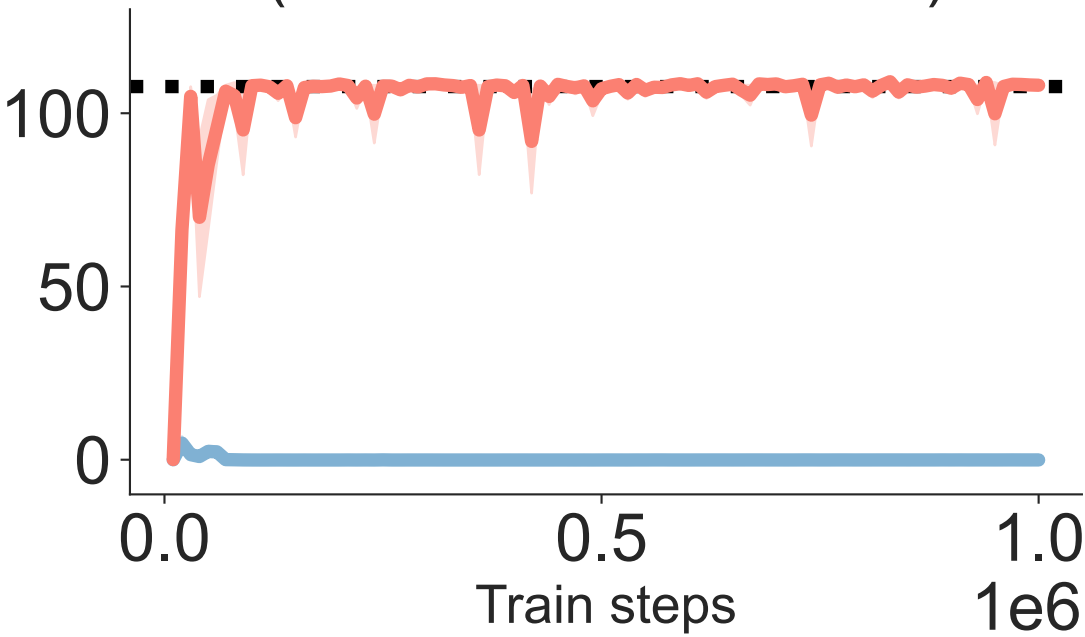

Supplement: supplementary_material [file adv_ablation_walker2d_random_expert.pdf › Codes/Figure_code/figures/adv_ablation_walker2d_random_expert.pdf]

# HAMMER (CLONED + EXPERT)

Score

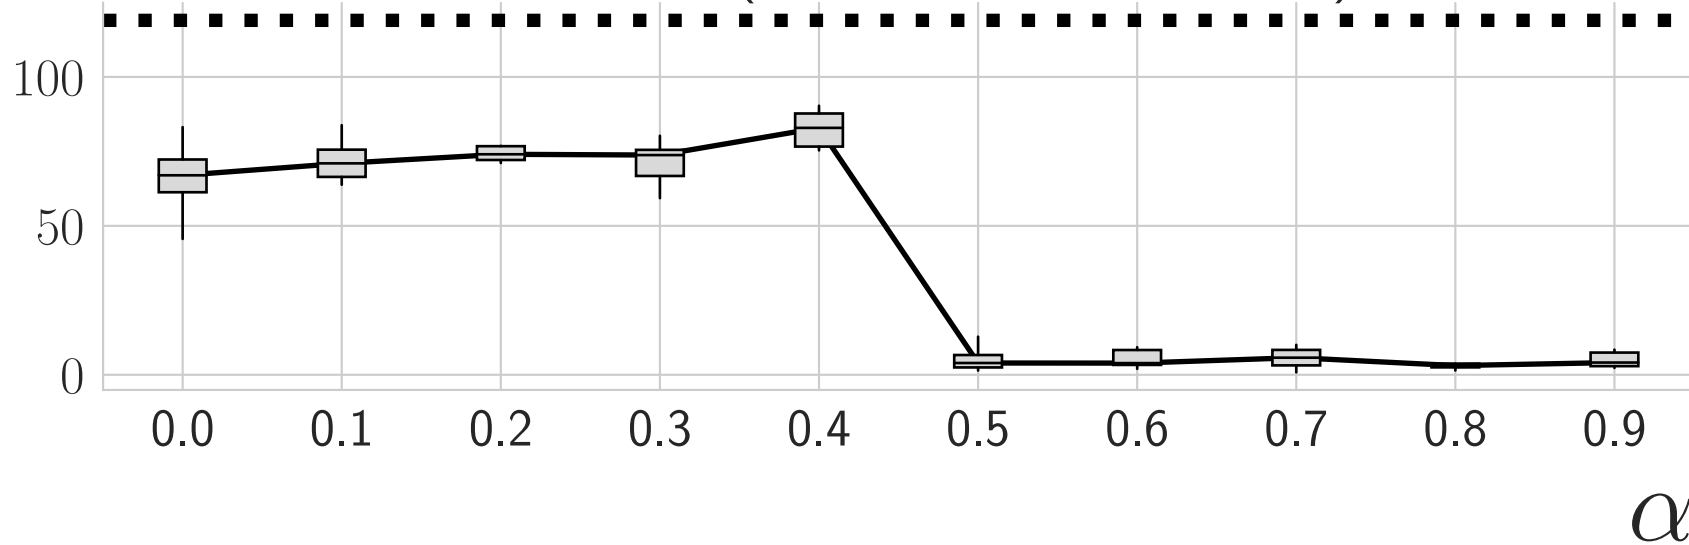

Supplement: supplementary_material [file alpha_ablation_study_hammer.pdf › Codes/Figure_code/figures/alpha_ablation_study_hammer.pdf]

# HOPPER (RANDOM + EXPERT)

Score

100

80

0.0

0.1

0.2

0.3

0.4

0.5

0.6

0.7

0.8

0.9

$\alpha$

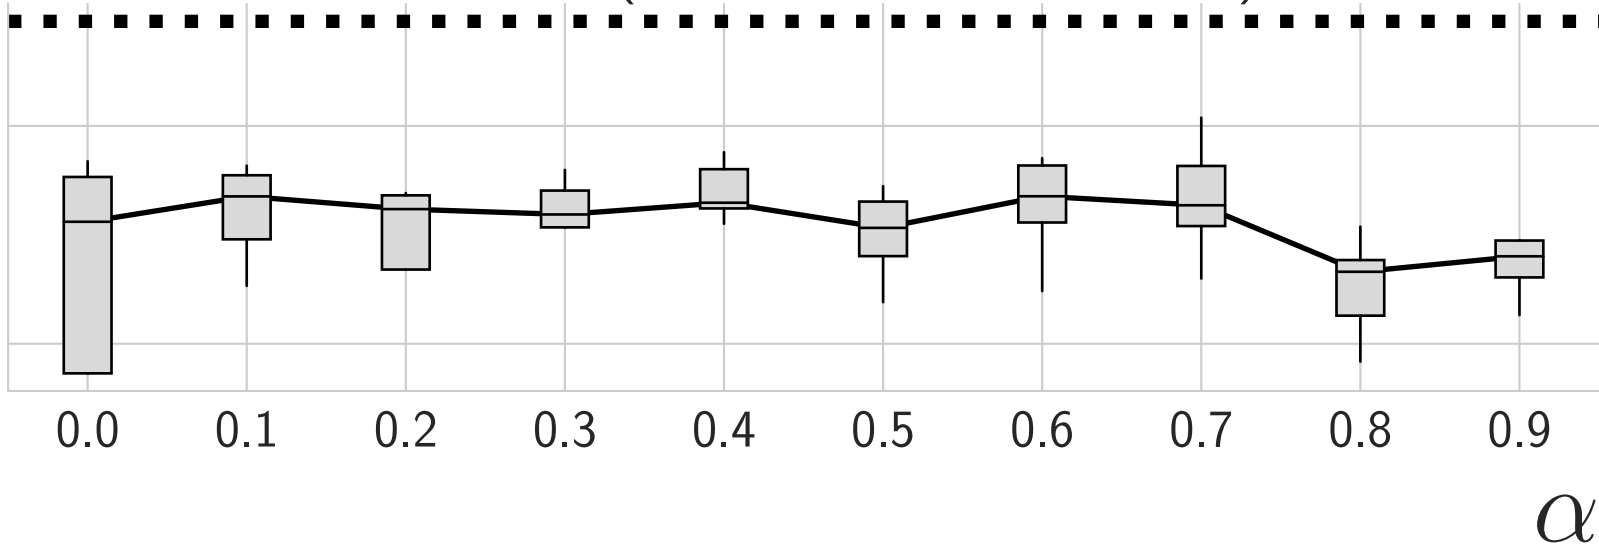

Supplement: supplementary_material [file alpha_ablation_study_hopper.pdf › Codes/Figure_code/figures/alpha_ablation_study_hopper.pdf]

# KITCHEN (PARTIAL + COMPLETE)

Score

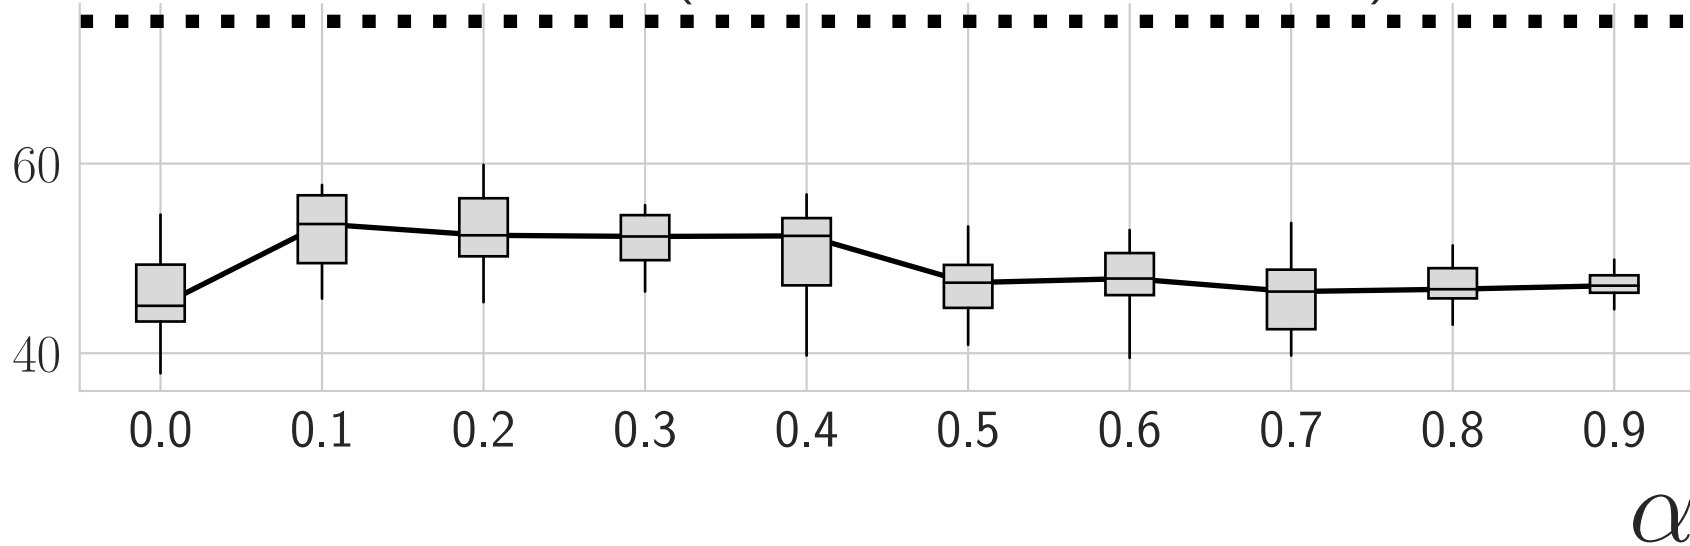

Supplement: supplementary_material [file alpha_ablation_study_kitchen.pdf › Codes/Figure_code/figures/alpha_ablation_study_kitchen.pdf]

# ANT (MEDIUM + EXPERT)

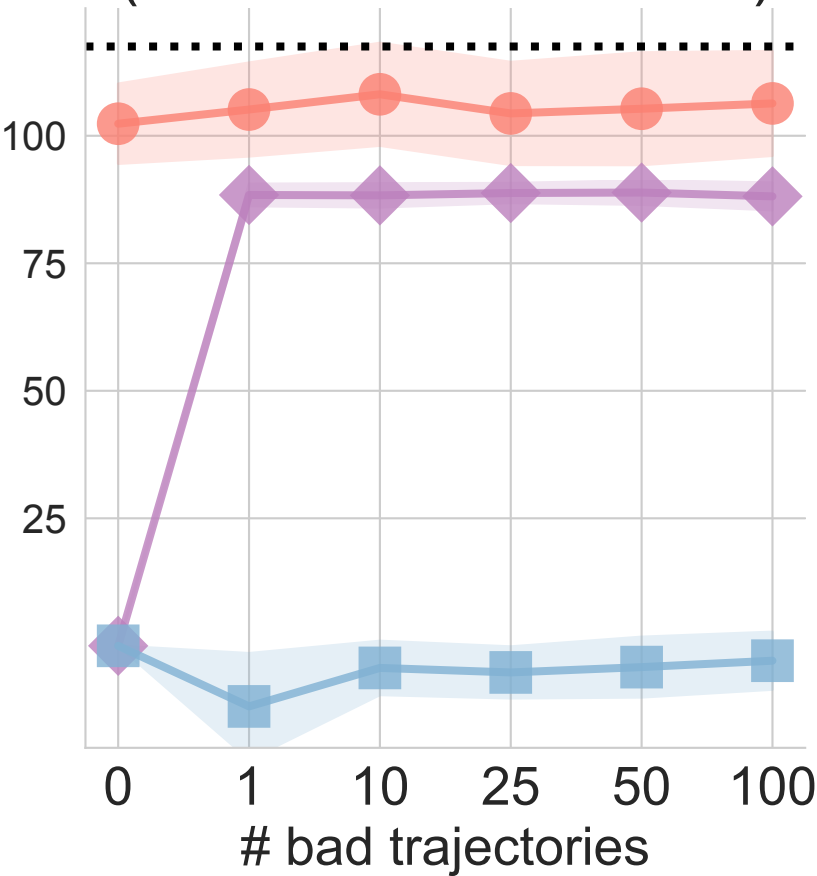

Supplement: supplementary_material [file dif_bad_size_ant_medium_expert.pdf › Codes/Figure_code/figures/dif_bad_size_ant_medium_expert.pdf]

# ANT (RANDOM + EXPERT)

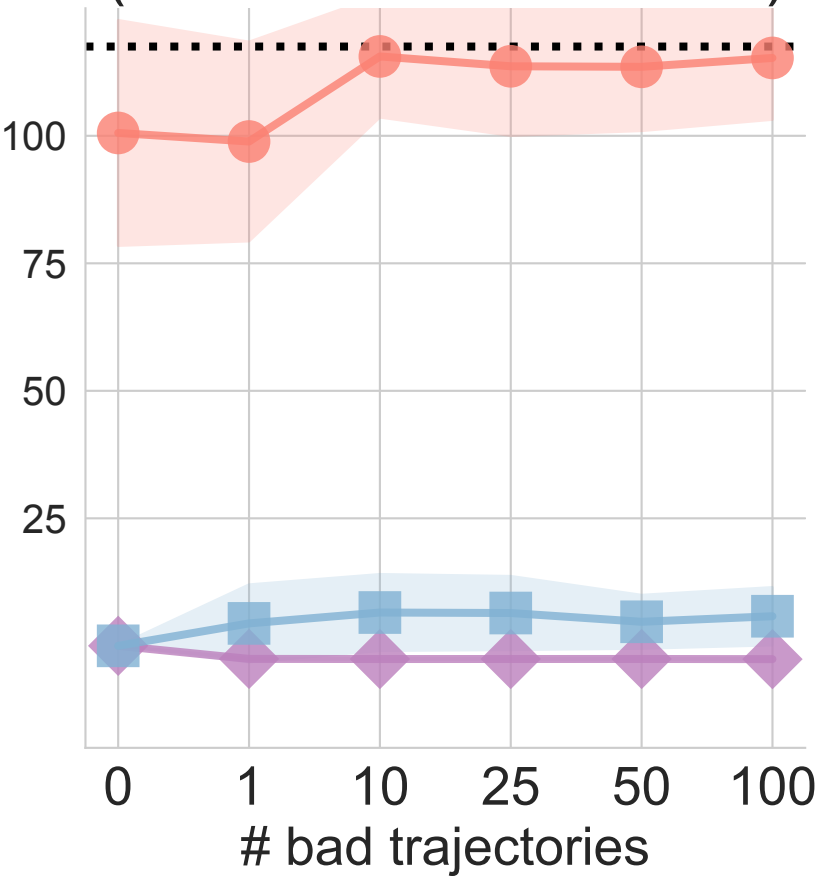

Supplement: supplementary_material [file dif_bad_size_ant_random_expert.pdf › Codes/Figure_code/figures/dif_bad_size_ant_random_expert.pdf]

# DOOR (CLONED + EXPERT)

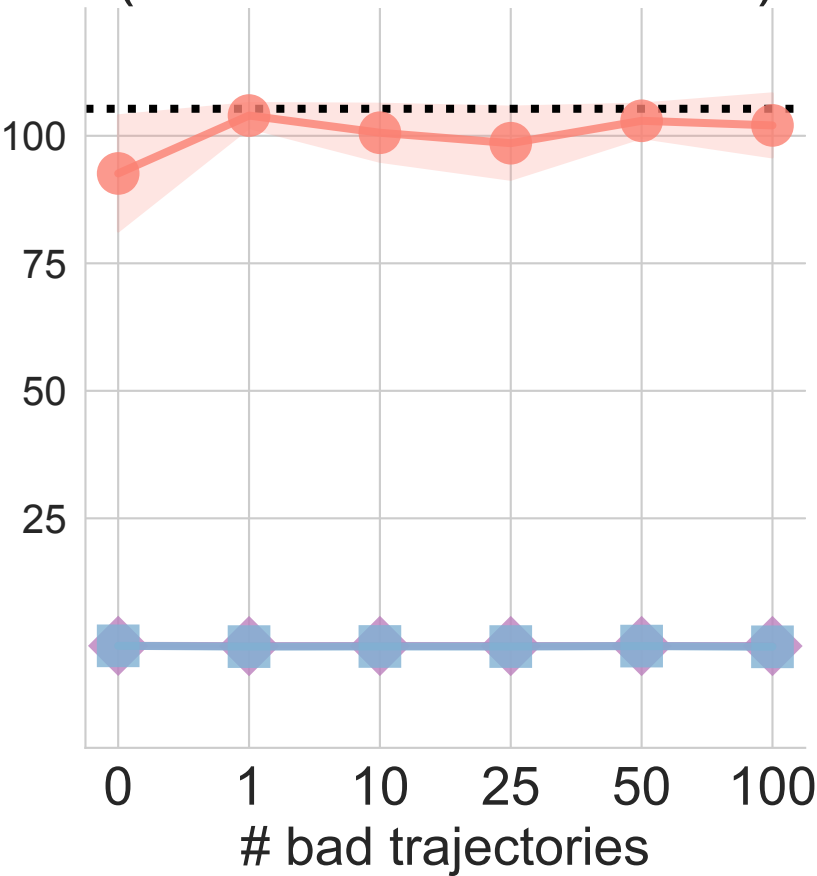

Supplement: supplementary_material [file dif_bad_size_door_cloned_expert.pdf › Codes/Figure_code/figures/dif_bad_size_door_cloned_expert.pdf]

# DOOR (HUMAN + EXPERT)

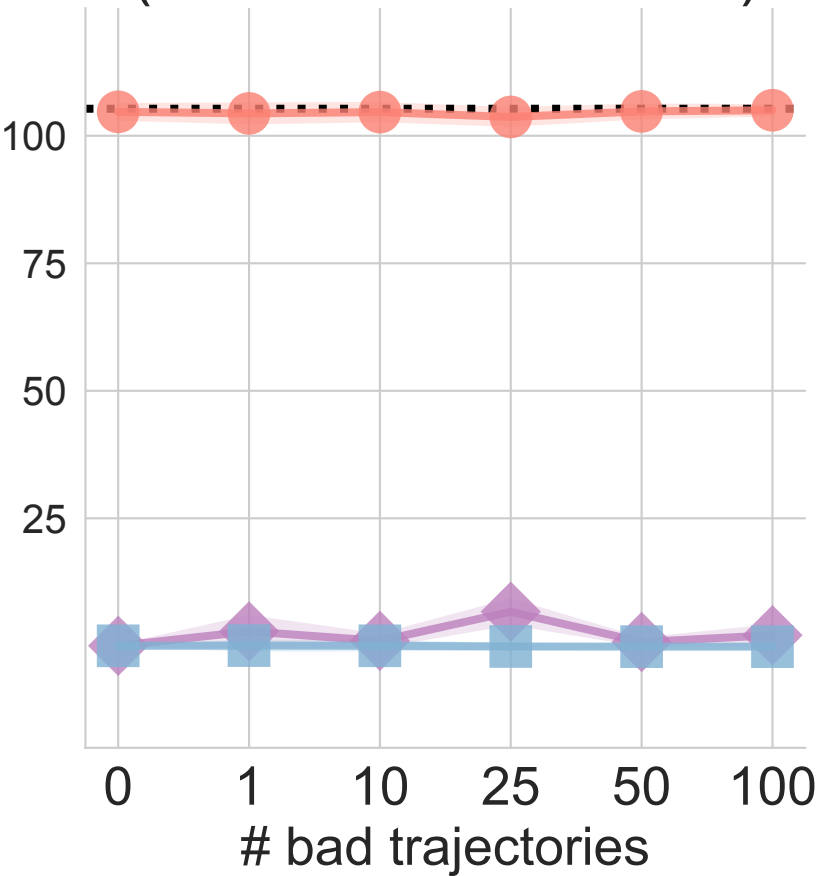

Supplement: supplementary_material [file dif_bad_size_door_human_expert.pdf › Codes/Figure_code/figures/dif_bad_size_door_human_expert.pdf]

# CHEETAH (MEDIUM + EXPERT)

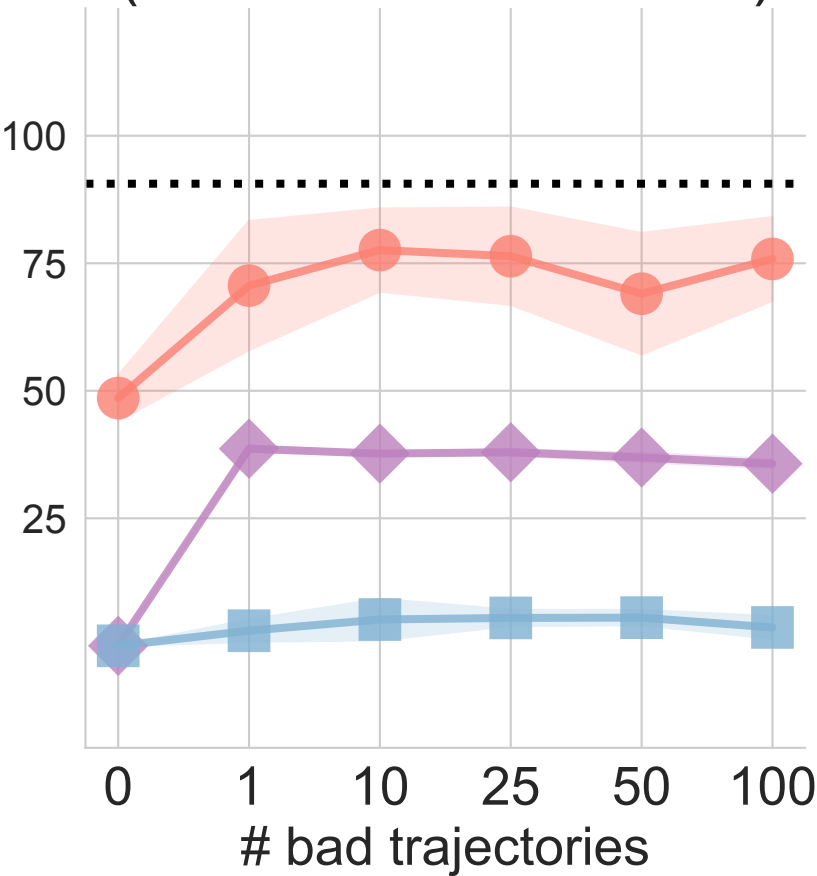

Supplement: supplementary_material [file dif_bad_size_halfcheetah_medium_expert.pdf › Codes/Figure_code/figures/dif_bad_size_halfcheetah_medium_expert.pdf]

# CHEETAH (RANDOM + EXPERT)

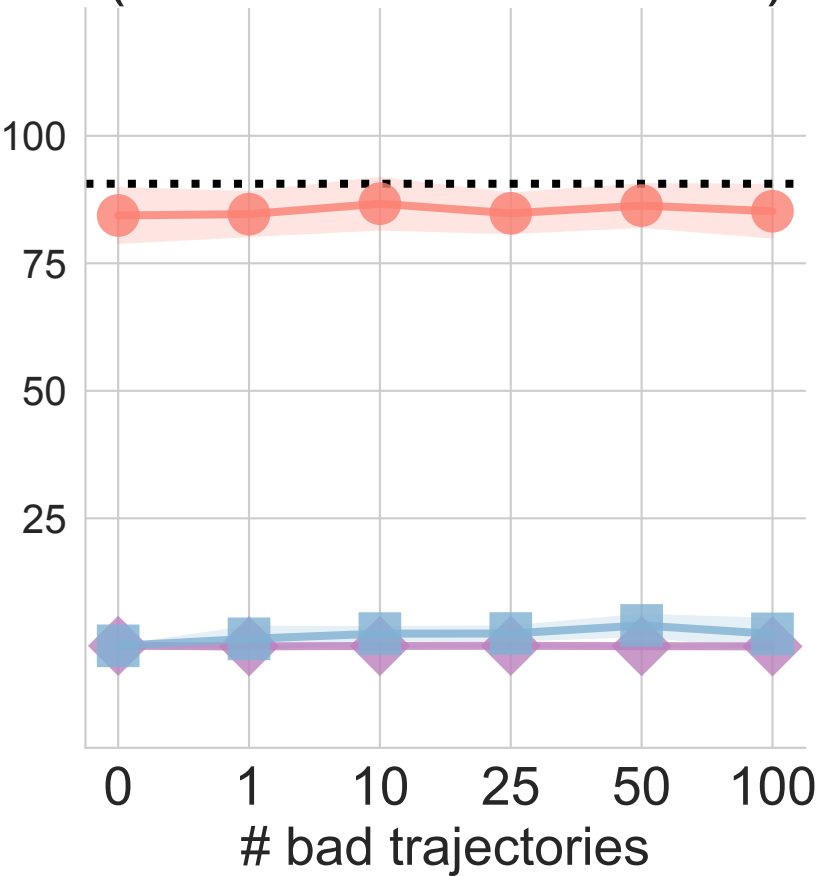

Supplement: supplementary_material [file dif_bad_size_halfcheetah_random_expert.pdf › Codes/Figure_code/figures/dif_bad_size_halfcheetah_random_expert.pdf]

# HAMMER (CLONED + EXPERT)

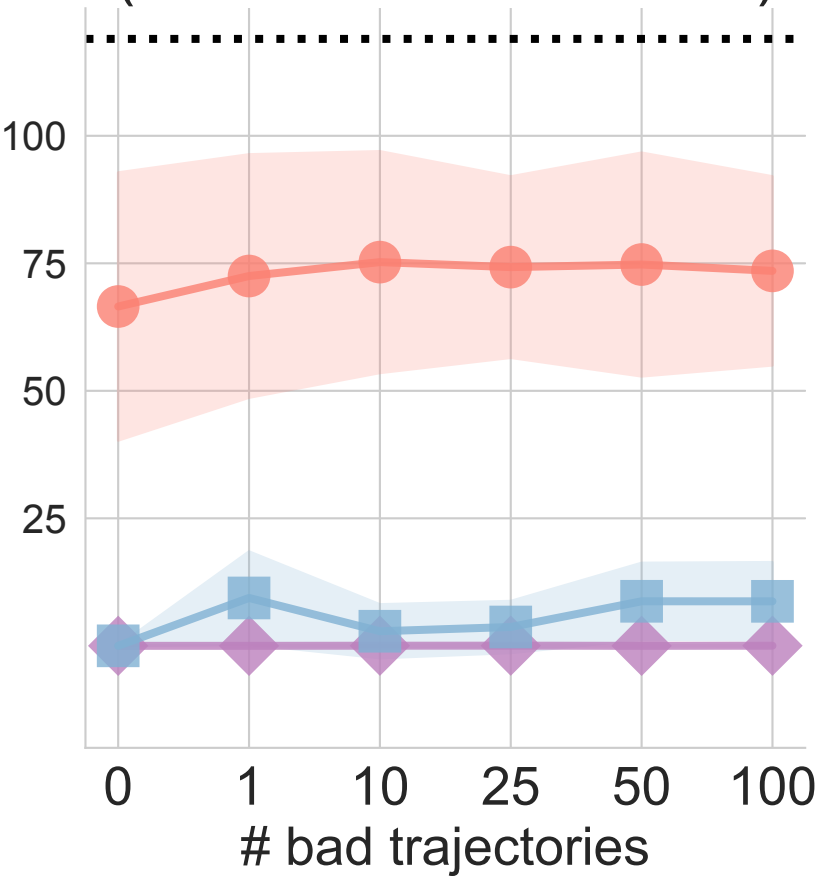

Supplement: supplementary_material [file dif_bad_size_hammer_cloned_expert.pdf › Codes/Figure_code/figures/dif_bad_size_hammer_cloned_expert.pdf]

# HAMMER (HUMAN + EXPERT)

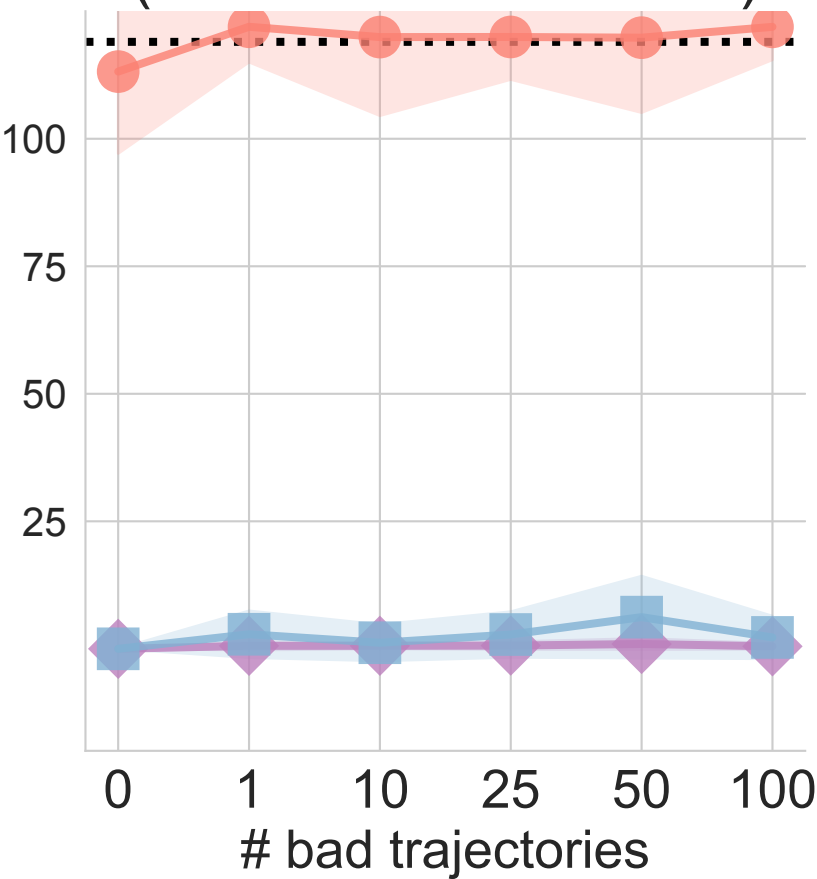

Supplement: supplementary_material [file dif_bad_size_hammer_human_expert.pdf › Codes/Figure_code/figures/dif_bad_size_hammer_human_expert.pdf]

# HOPPER (MEDIUM + EXPERT)

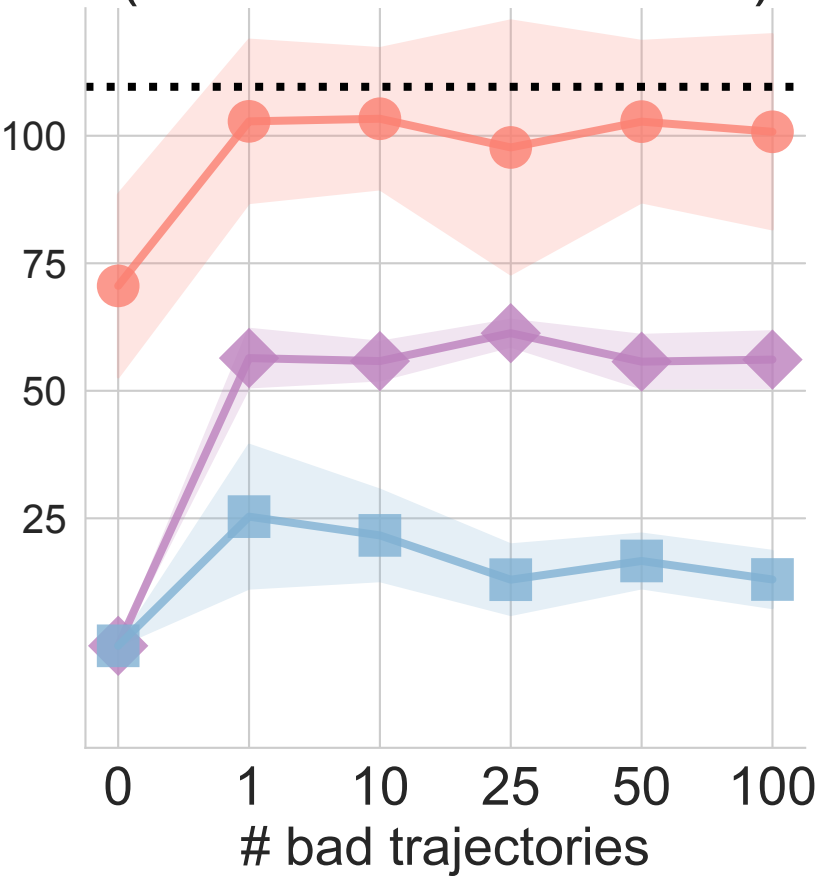

Supplement: supplementary_material [file dif_bad_size_hopper_medium_expert.pdf › Codes/Figure_code/figures/dif_bad_size_hopper_medium_expert.pdf]

# HOPPER (RANDOM + EXPERT)

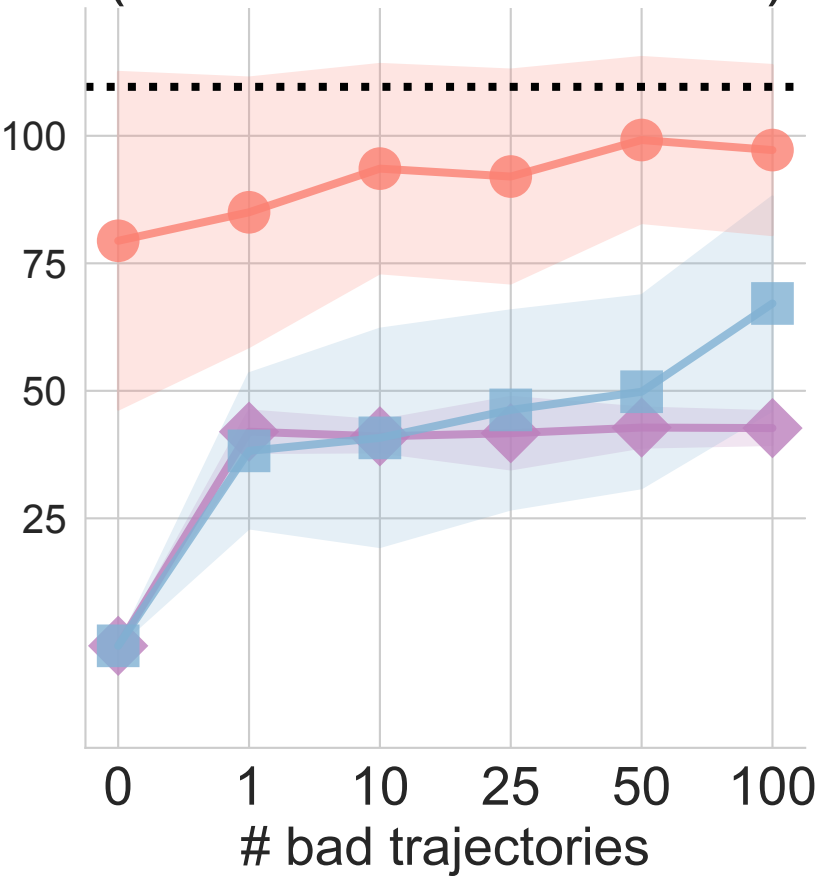

Supplement: supplementary_material [file dif_bad_size_hopper_random_expert.pdf › Codes/Figure_code/figures/dif_bad_size_hopper_random_expert.pdf]

# KITCHEN (PARTIAL + COMPLETE)

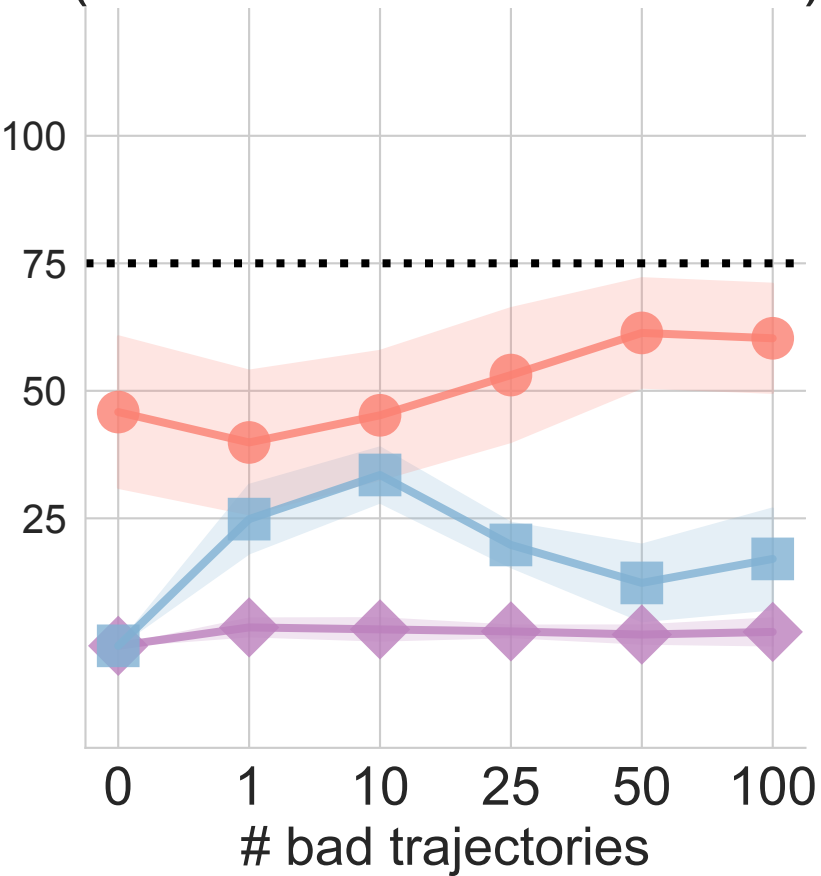

Supplement: supplementary_material [file dif_bad_size_kitchen_partial_complete.pdf › Codes/Figure_code/figures/dif_bad_size_kitchen_partial_complete.pdf]

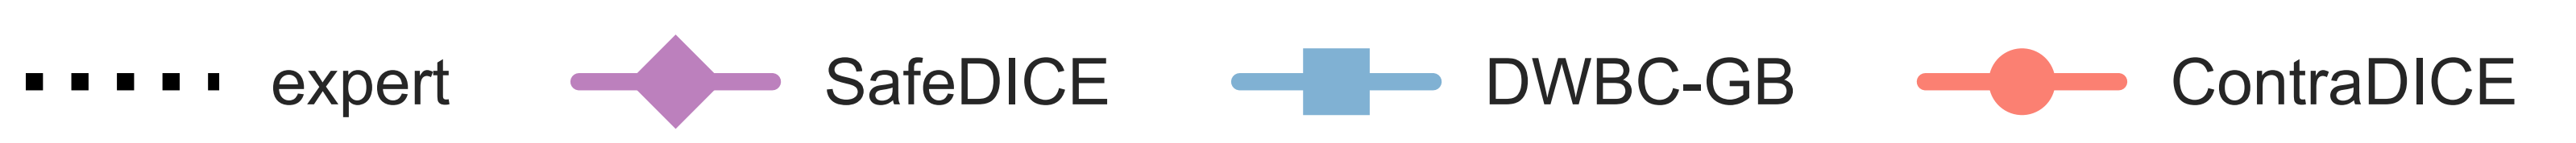

Supplement: supplementary_material [file dif_bad_size_legend.pdf › Codes/Figure_code/figures/dif_bad_size_legend.pdf]

# PEN (CLONED + EXPERT)

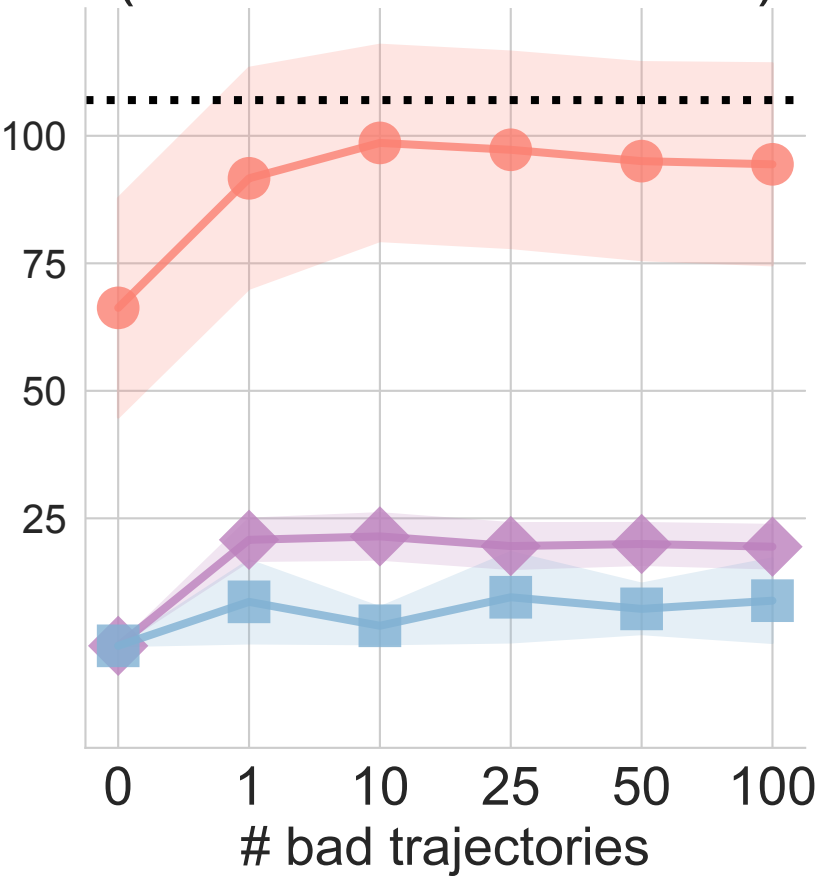

Supplement: supplementary_material [file dif_bad_size_pen_cloned_expert.pdf › Codes/Figure_code/figures/dif_bad_size_pen_cloned_expert.pdf]

# PEN (HUMAN + EXPERT)

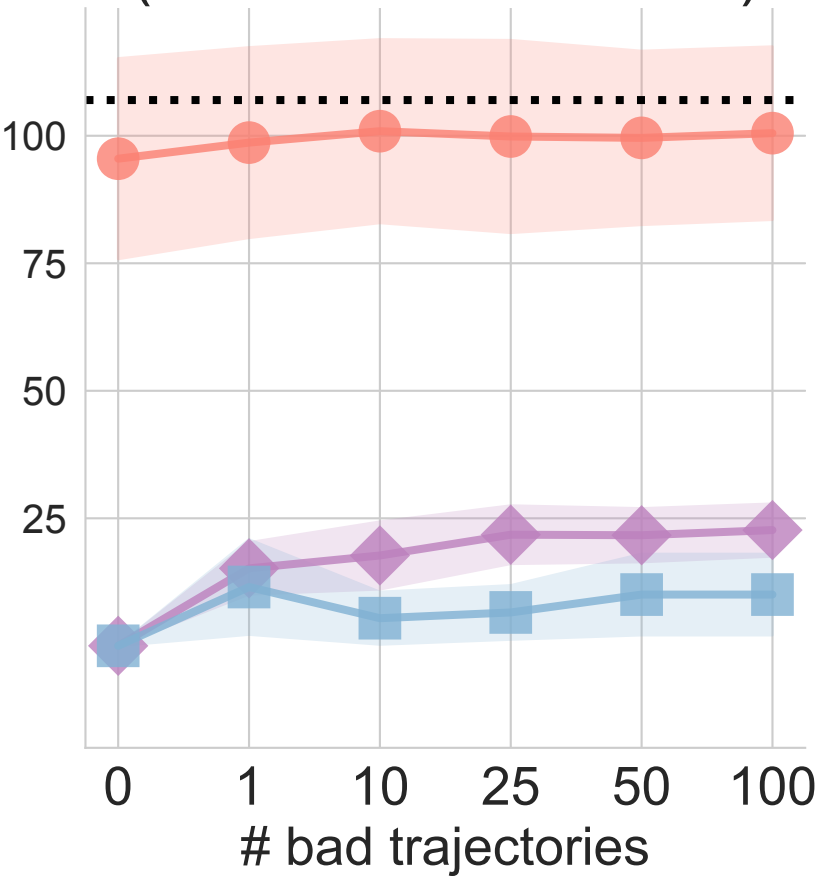

Supplement: supplementary_material [file dif_bad_size_pen_human_expert.pdf › Codes/Figure_code/figures/dif_bad_size_pen_human_expert.pdf]

# RELOCATE (CLONED + EXPERT)

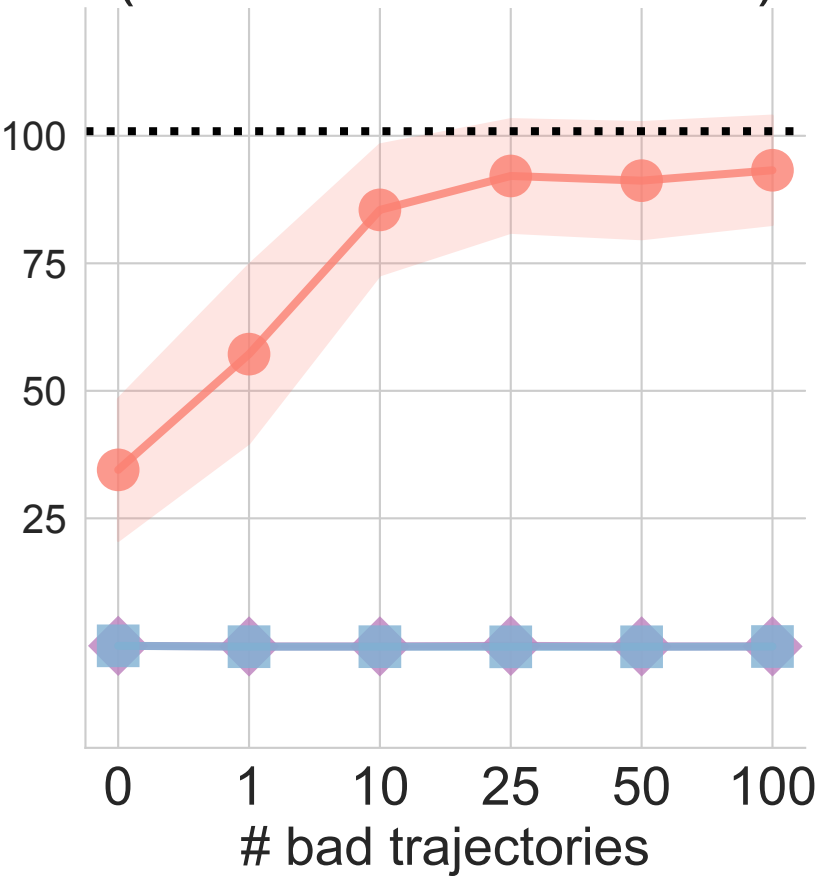

Supplement: supplementary_material [file dif_bad_size_relocate_cloned_expert.pdf › Codes/Figure_code/figures/dif_bad_size_relocate_cloned_expert.pdf]

# RELOCATE (HUMAN + EXPERT)

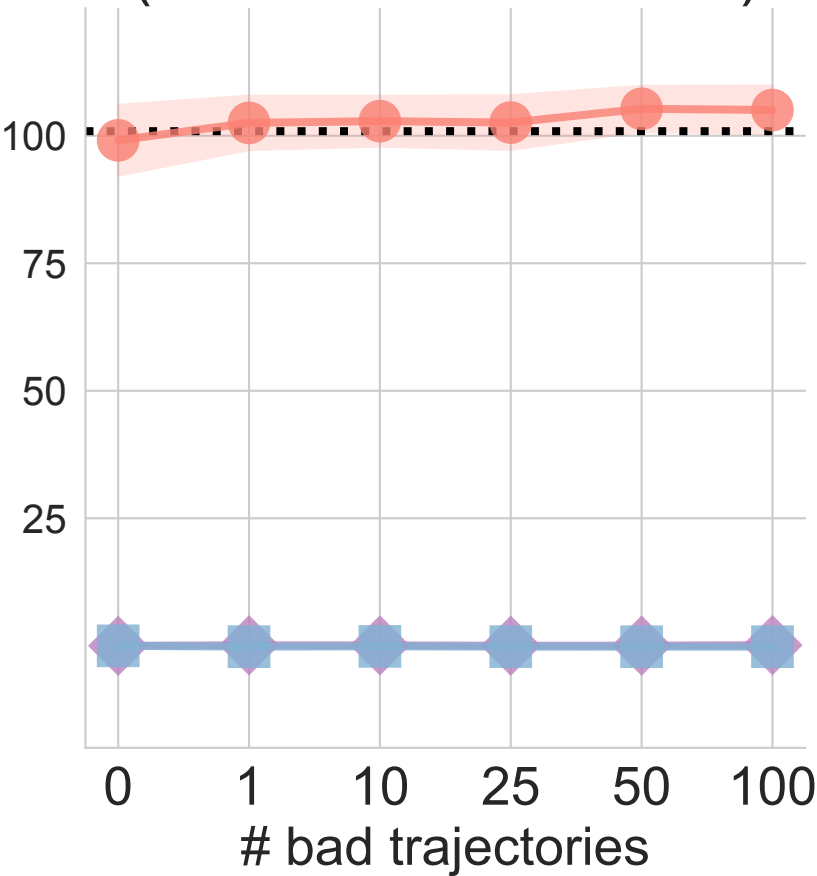

Supplement: supplementary_material [file dif_bad_size_relocate_human_expert.pdf › Codes/Figure_code/figures/dif_bad_size_relocate_human_expert.pdf]

# WALKER (MEDIUM + EXPERT)

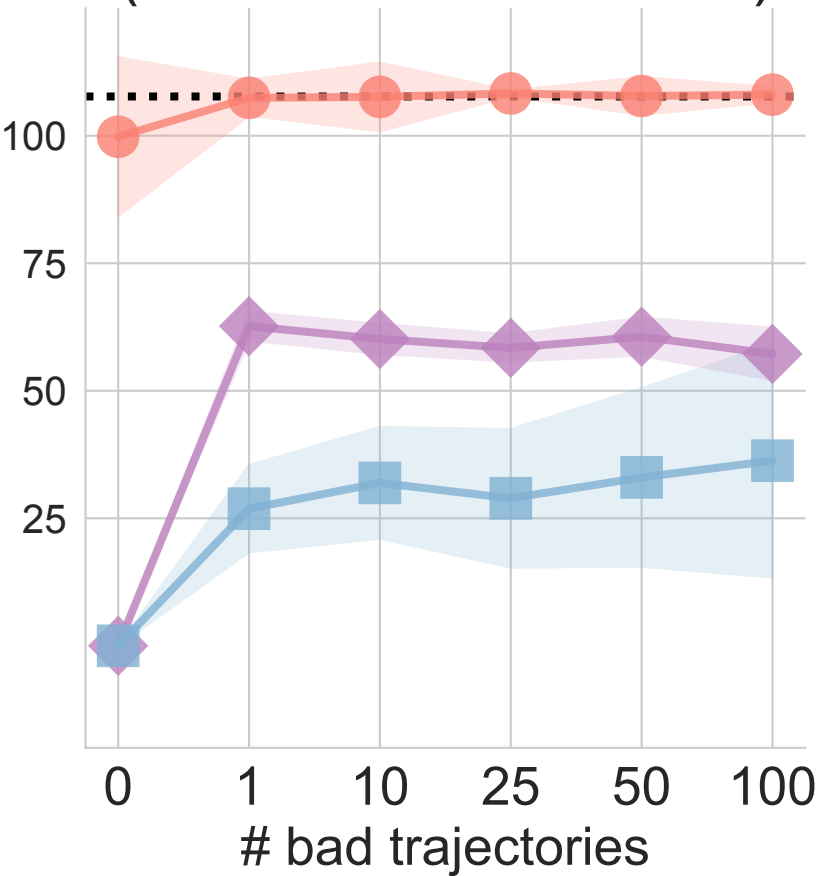

Supplement: supplementary_material [file dif_bad_size_walker2d_medium_expert.pdf › Codes/Figure_code/figures/dif_bad_size_walker2d_medium_expert.pdf]

# WALKER (RANDOM + EXPERT)

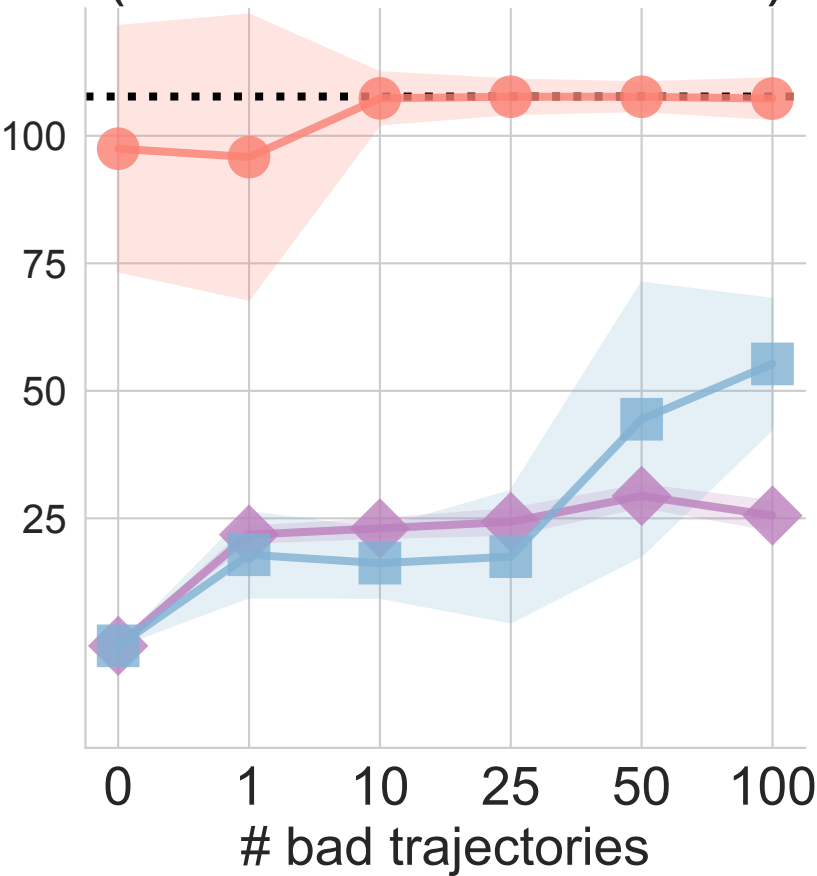

Supplement: supplementary_material [file dif_bad_size_walker2d_random_expert.pdf › Codes/Figure_code/figures/dif_bad_size_walker2d_random_expert.pdf]

# ANT (MEDIUM + EXPERT)

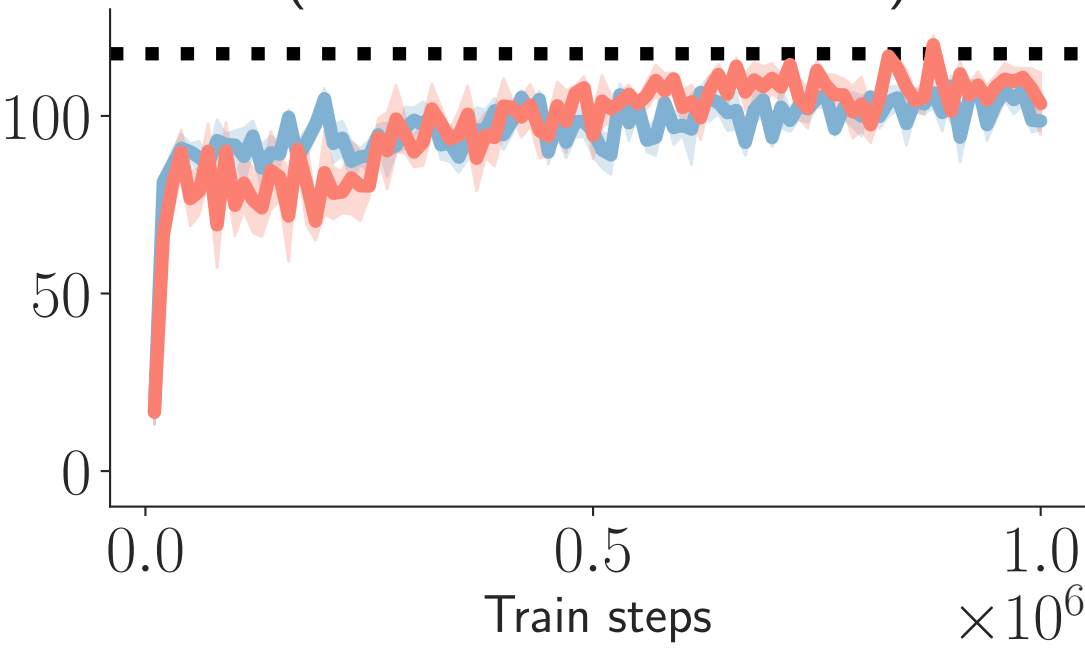

Supplement: supplementary_material [file exp_ablation_ant_medium_expert.pdf › Codes/Figure_code/figures/exp_ablation_ant_medium_expert.pdf]

# ANT (RANDOM + EXPERT)

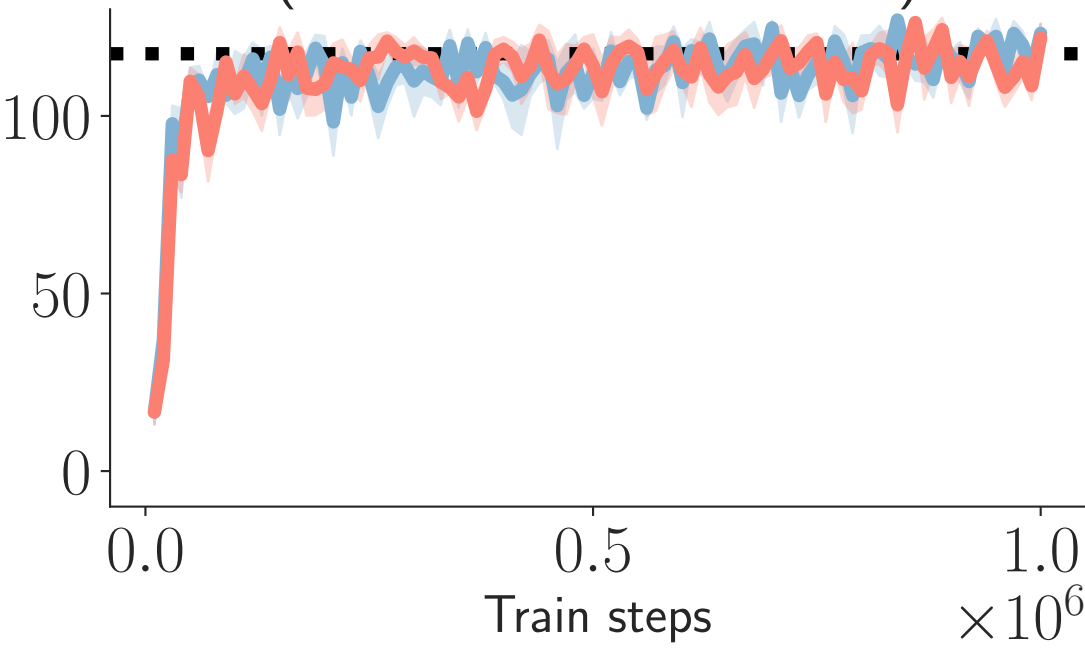

Supplement: supplementary_material [file exp_ablation_ant_random_expert.pdf › Codes/Figure_code/figures/exp_ablation_ant_random_expert.pdf]

# DOOR (CLONED + EXPERT)

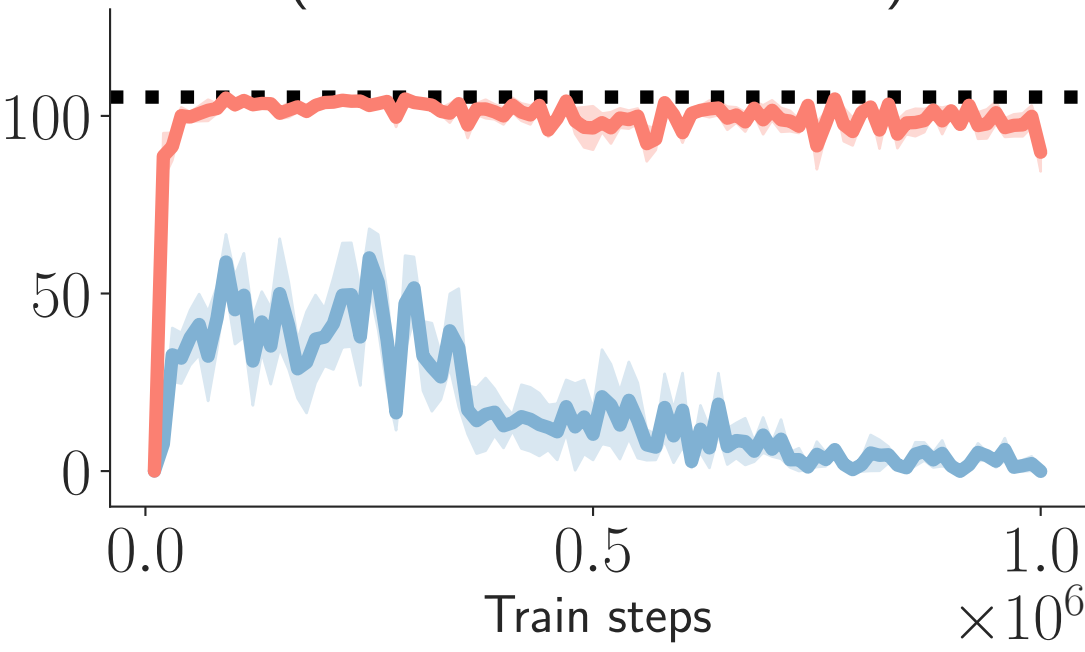

Supplement: supplementary_material [file exp_ablation_door_cloned_expert.pdf › Codes/Figure_code/figures/exp_ablation_door_cloned_expert.pdf]

# DOOR (HUMAN + EXPERT)

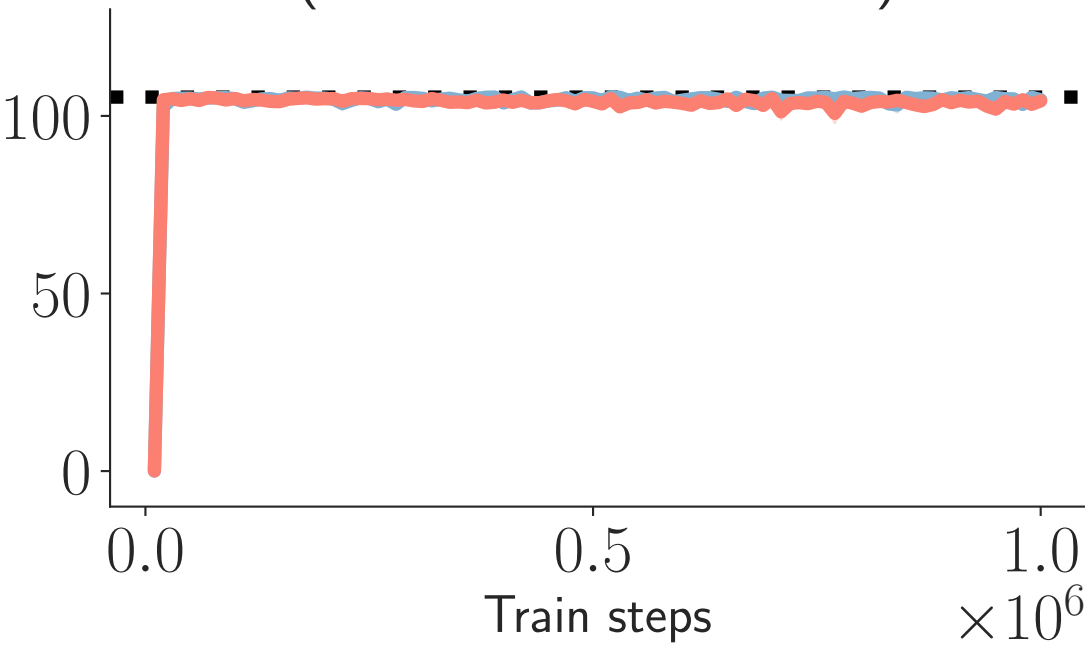

Supplement: supplementary_material [file exp_ablation_door_human_expert.pdf › Codes/Figure_code/figures/exp_ablation_door_human_expert.pdf]

# CHEETAH (MEDIUM + EXPERT)

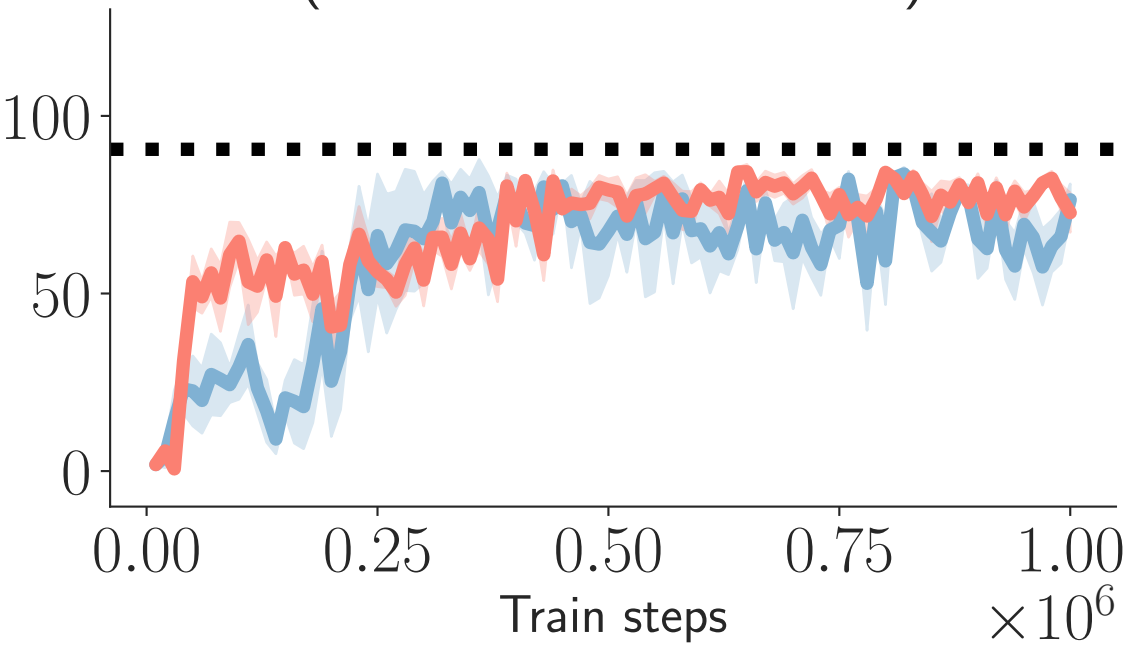

Supplement: supplementary_material [file exp_ablation_halfcheetah_medium_expert.pdf › Codes/Figure_code/figures/exp_ablation_halfcheetah_medium_expert.pdf]

# CHEETAH

(RANDOM + EXPERT)

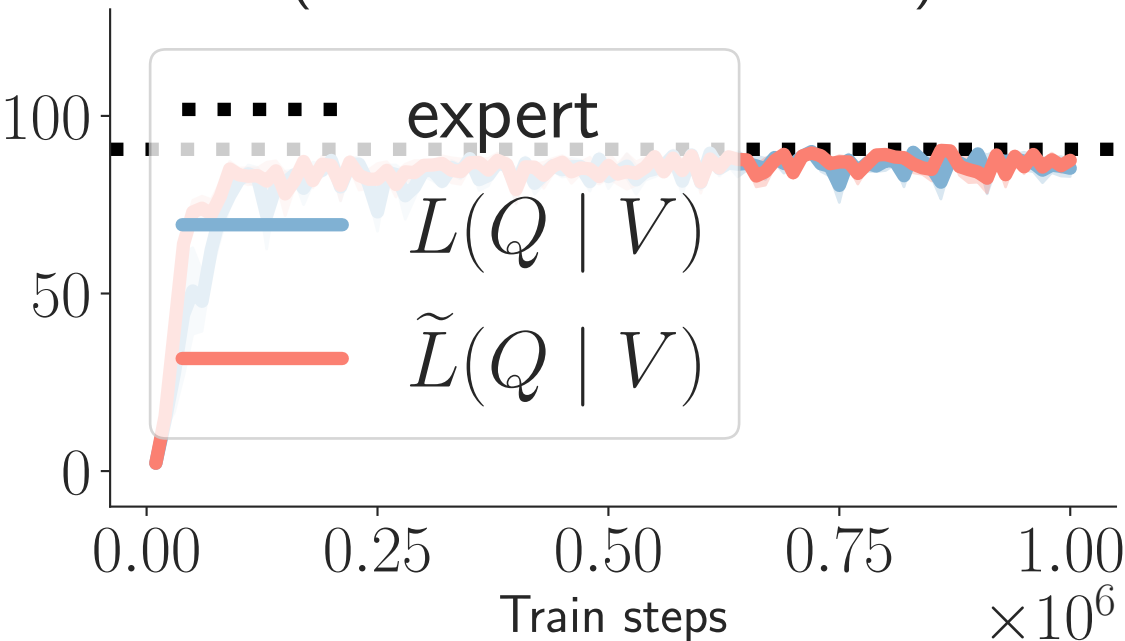

Supplement: supplementary_material [file exp_ablation_halfcheetah_random_expert.pdf › Codes/Figure_code/figures/exp_ablation_halfcheetah_random_expert.pdf]

# HAMMER (CLONED + EXPERT)

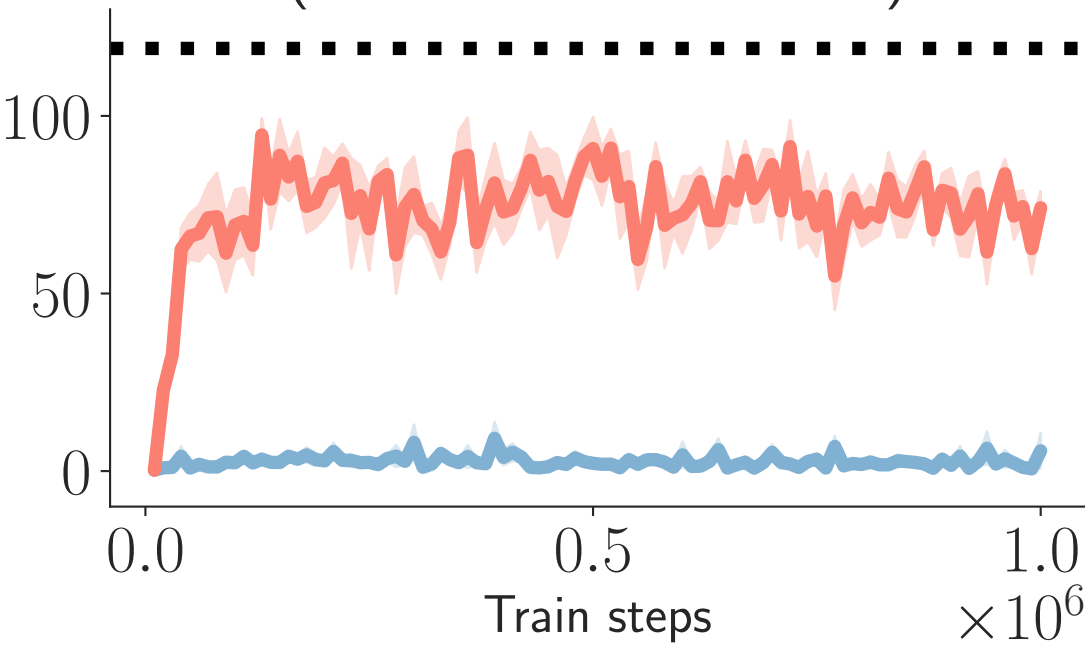

Supplement: supplementary_material [file exp_ablation_hammer_cloned_expert.pdf › Codes/Figure_code/figures/exp_ablation_hammer_cloned_expert.pdf]

# HAMMER (HUMAN + EXPERT)

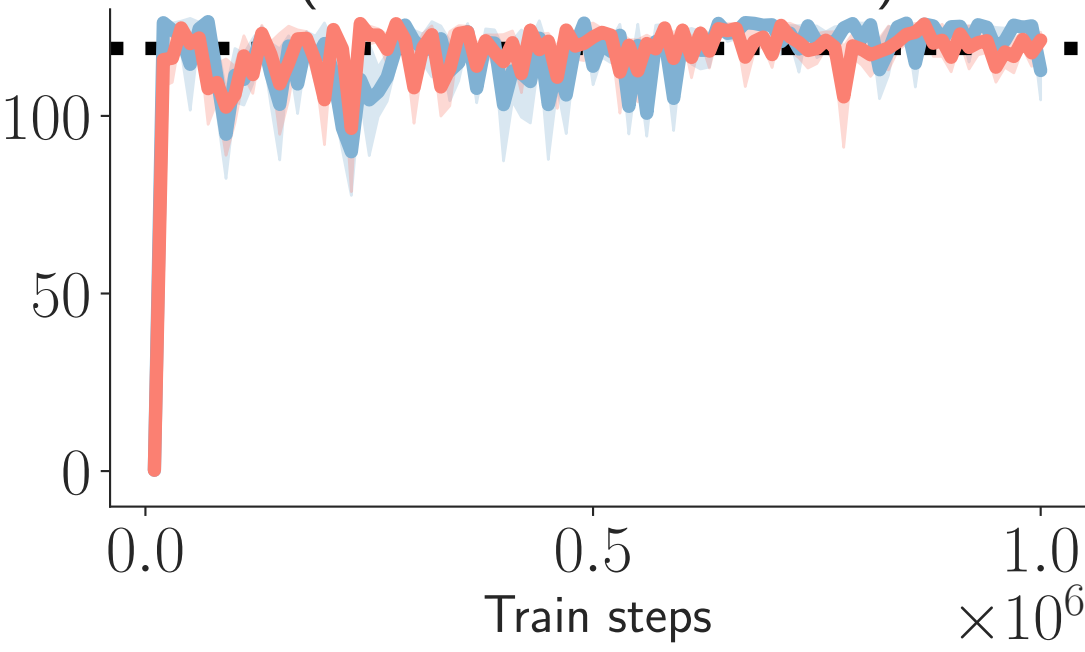

Supplement: supplementary_material [file exp_ablation_hammer_human_expert.pdf › Codes/Figure_code/figures/exp_ablation_hammer_human_expert.pdf]

# HOPPER (MEDIUM + EXPERT)

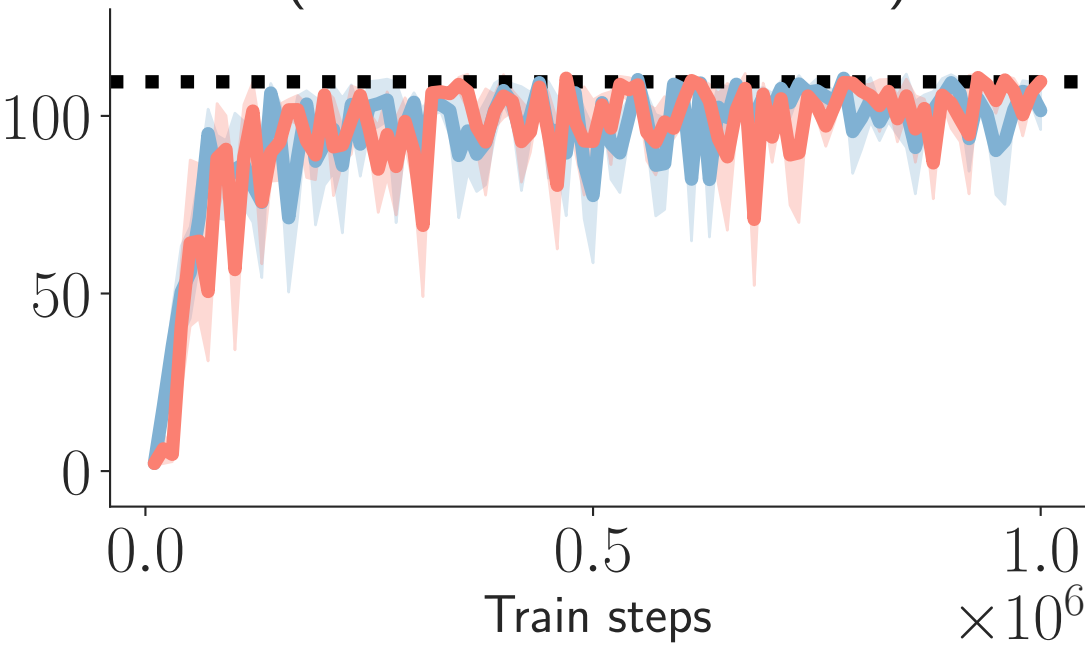

Supplement: supplementary_material [file exp_ablation_hopper_medium_expert.pdf › Codes/Figure_code/figures/exp_ablation_hopper_medium_expert.pdf]

# HOPPER (RANDOM + EXPERT)

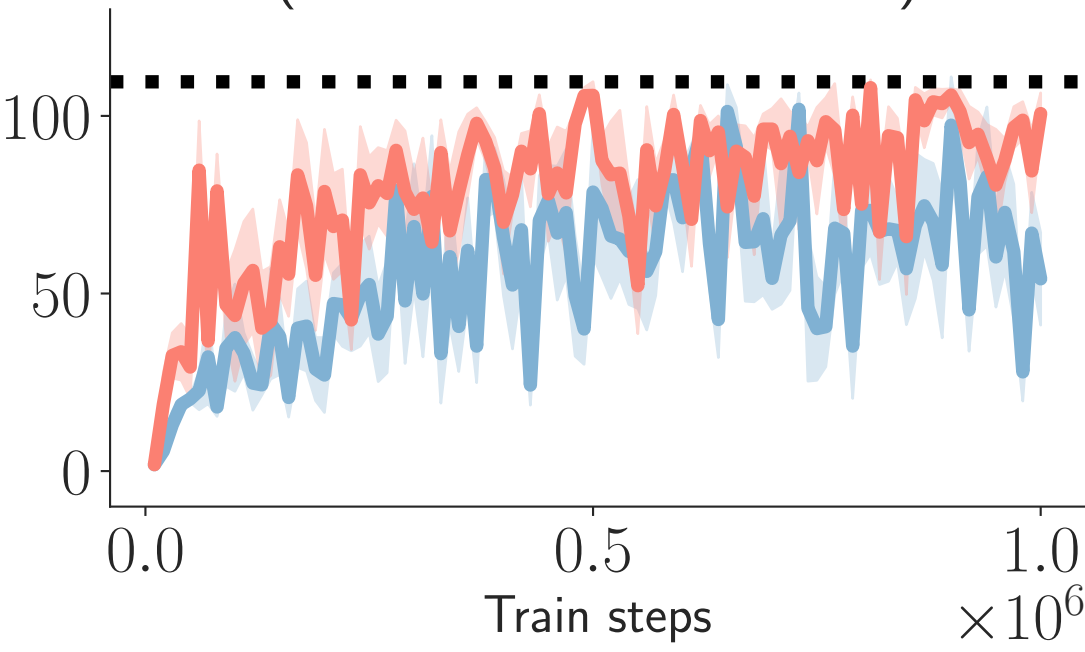

Supplement: supplementary_material [file exp_ablation_hopper_random_expert.pdf › Codes/Figure_code/figures/exp_ablation_hopper_random_expert.pdf]

# PEN (CLONED + EXPERT)

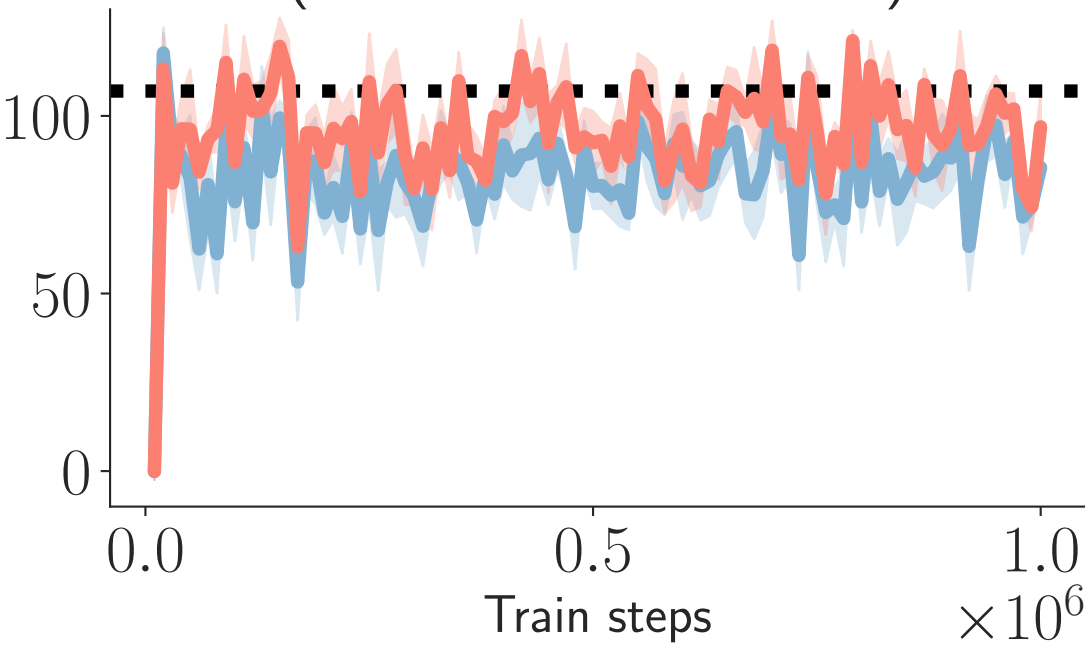

Supplement: supplementary_material [file exp_ablation_pen_cloned_expert.pdf › Codes/Figure_code/figures/exp_ablation_pen_cloned_expert.pdf]

# PEN (HUMAN + EXPERT)

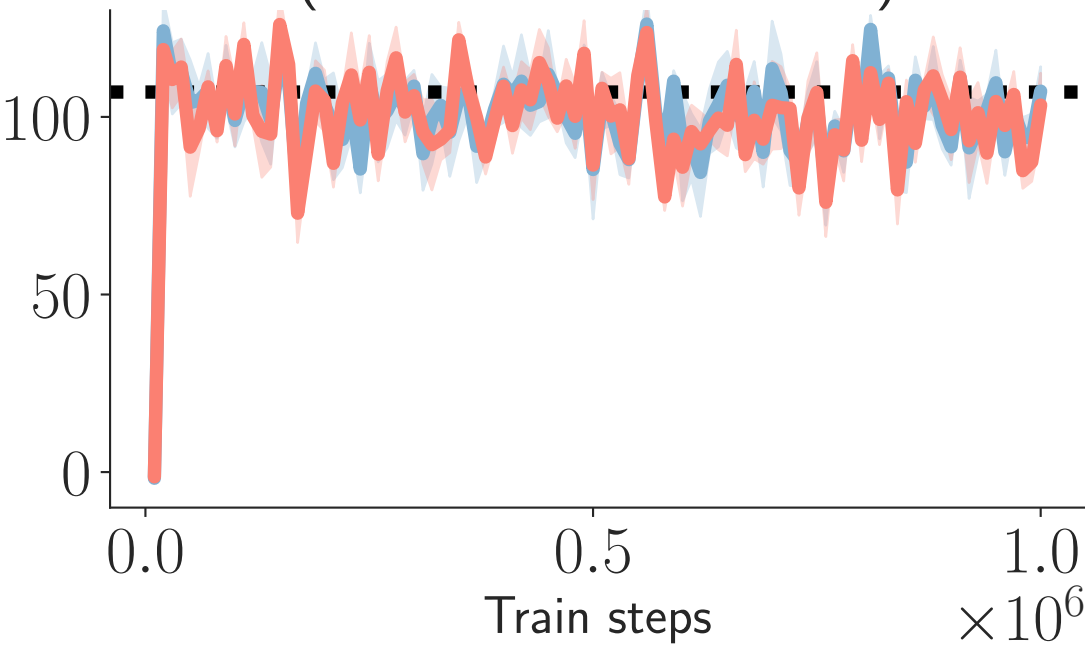

Supplement: supplementary_material [file exp_ablation_pen_human_expert.pdf › Codes/Figure_code/figures/exp_ablation_pen_human_expert.pdf]

# RELOCATE (CLONED + EXPERT)

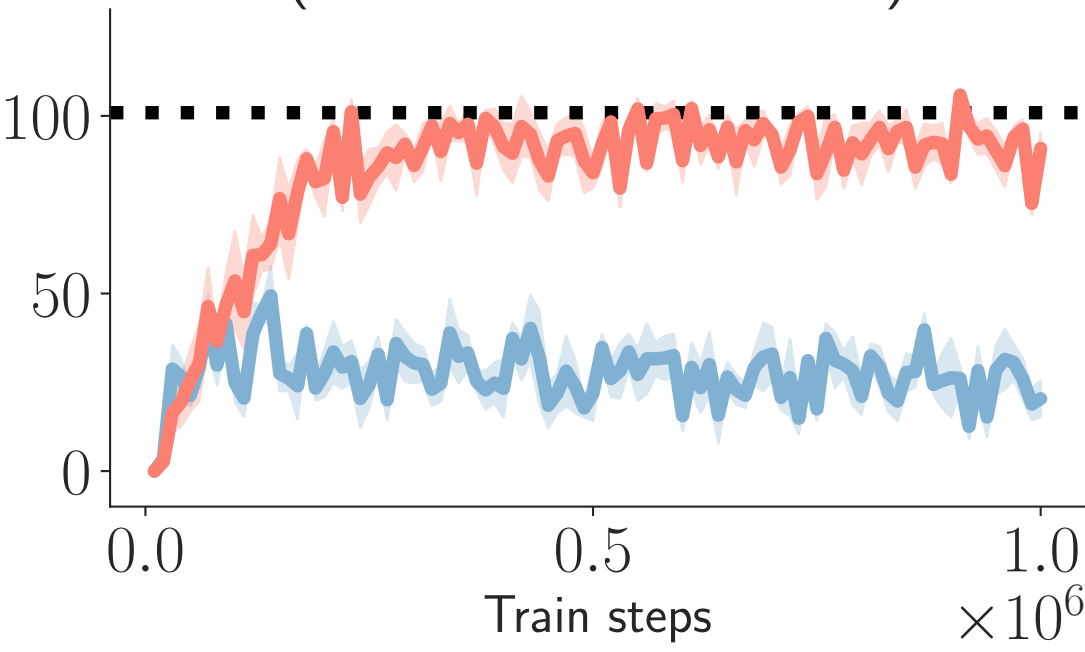

Supplement: supplementary_material [file exp_ablation_relocate_cloned_expert.pdf › Codes/Figure_code/figures/exp_ablation_relocate_cloned_expert.pdf]

# RELOCATE (HUMAN + EXPERT)

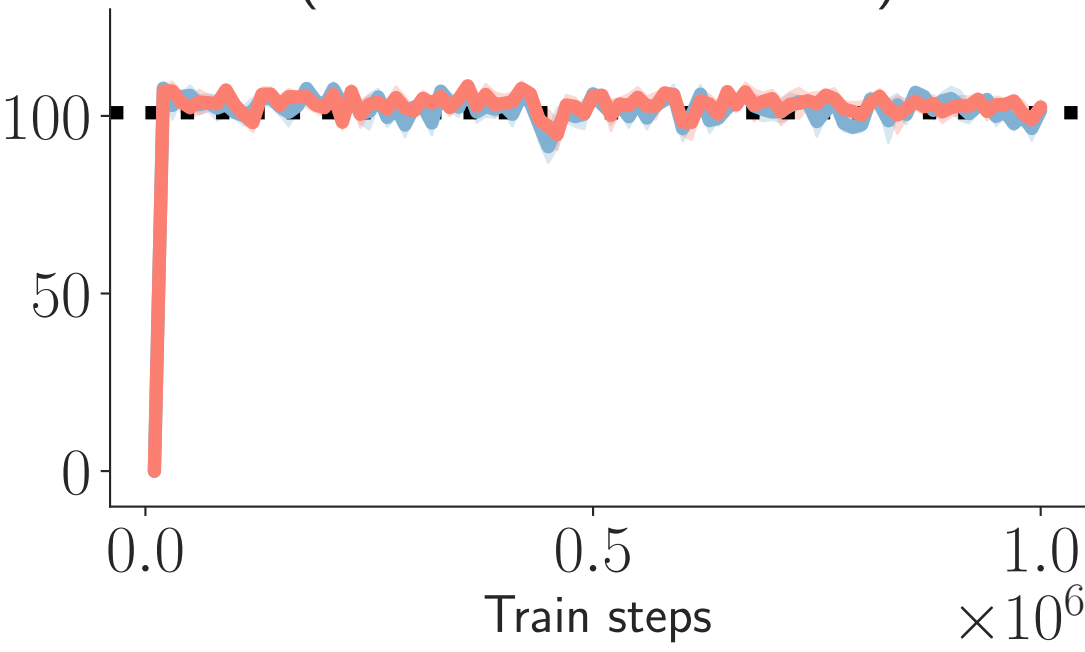

Supplement: supplementary_material [file exp_ablation_relocate_human_expert.pdf › Codes/Figure_code/figures/exp_ablation_relocate_human_expert.pdf]

# WALKER (MEDIUM + EXPERT)

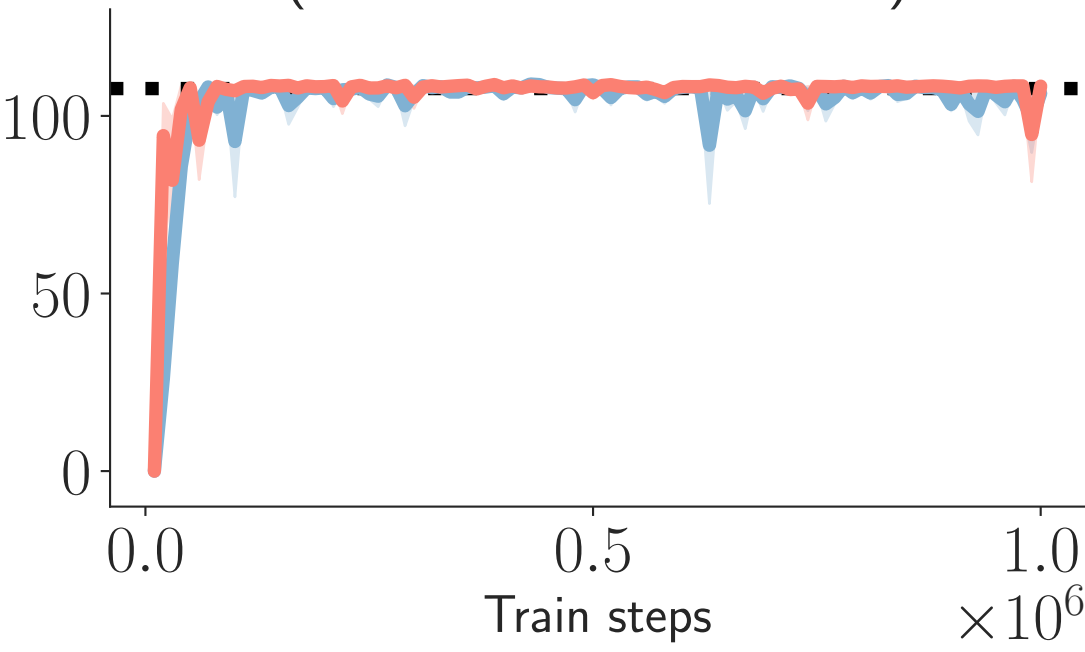

Supplement: supplementary_material [file exp_ablation_walker2d_medium_expert.pdf › Codes/Figure_code/figures/exp_ablation_walker2d_medium_expert.pdf]

# WALKER (RANDOM + EXPERT)

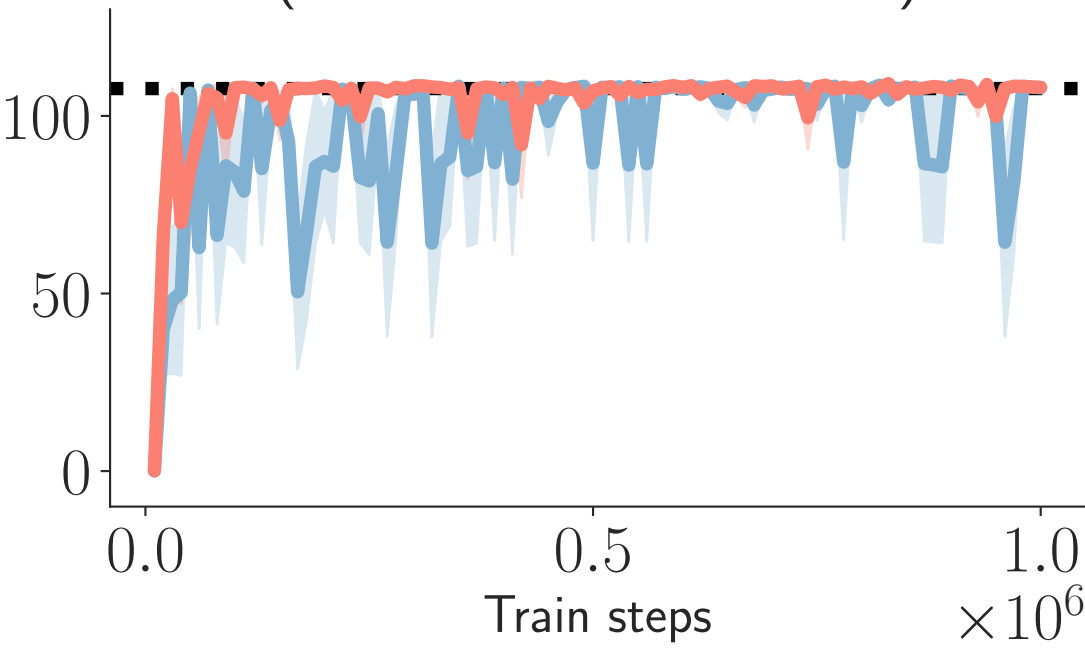

Supplement: supplementary_material [file exp_ablation_walker2d_random_expert.pdf › Codes/Figure_code/figures/exp_ablation_walker2d_random_expert.pdf]

# ANT (MEDIUM + EXPERT)

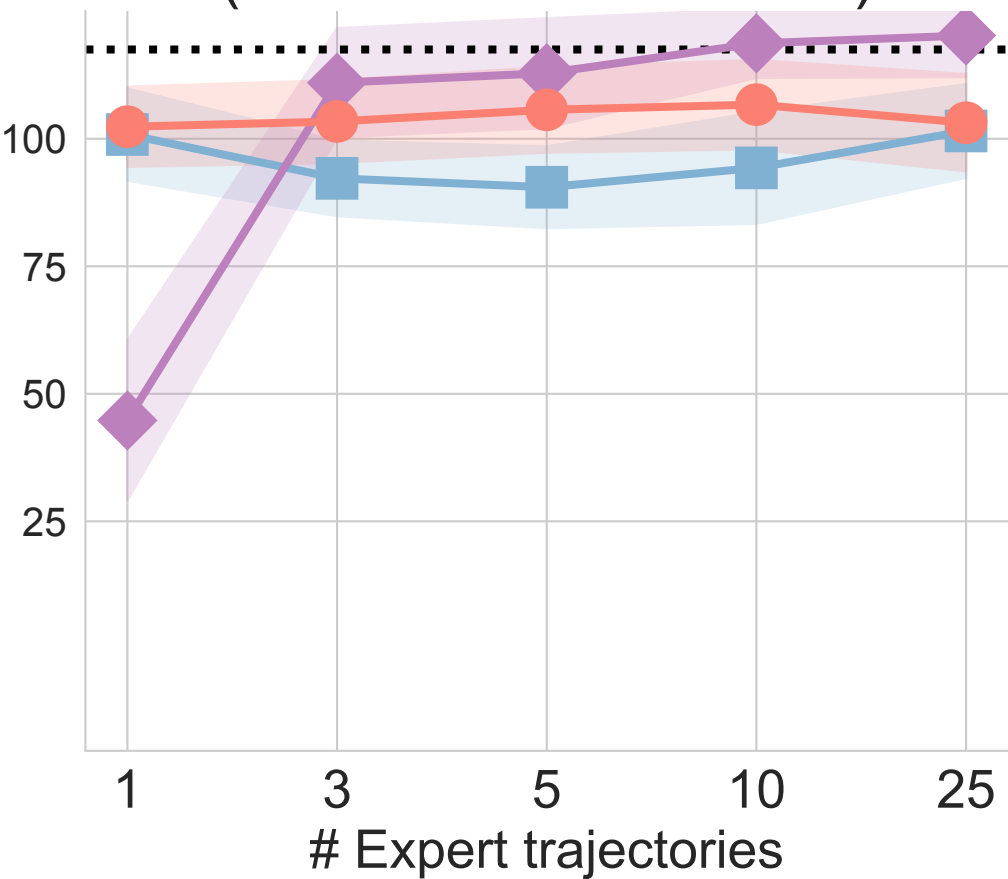

Supplement: supplementary_material [file increase_good_ant_medium_expert.pdf › Codes/Figure_code/figures/increase_good_ant_medium_expert.pdf]

# ANT (RANDOM + EXPERT)

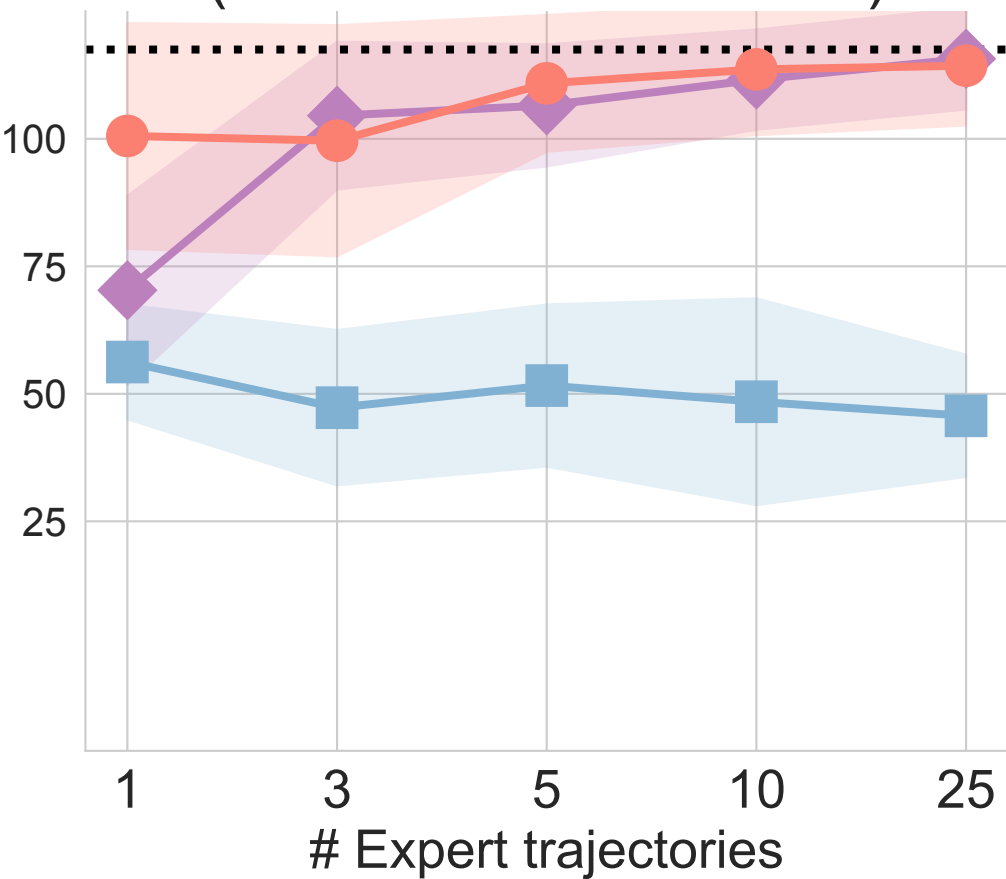

Supplement: supplementary_material [file increase_good_ant_random_expert.pdf › Codes/Figure_code/figures/increase_good_ant_random_expert.pdf]

# DOOR (CLONED + EXPERT)

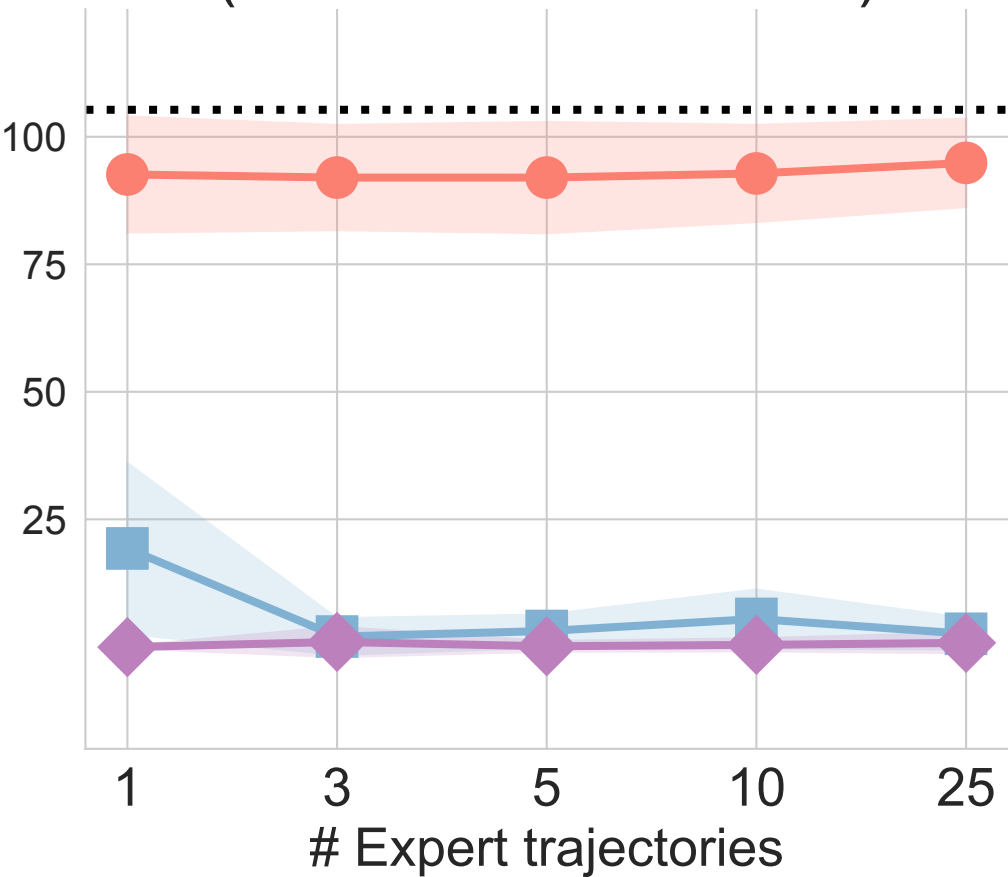

Supplement: supplementary_material [file increase_good_door_cloned_expert.pdf › Codes/Figure_code/figures/increase_good_door_cloned_expert.pdf]

# DOOR (HUMAN + EXPERT)

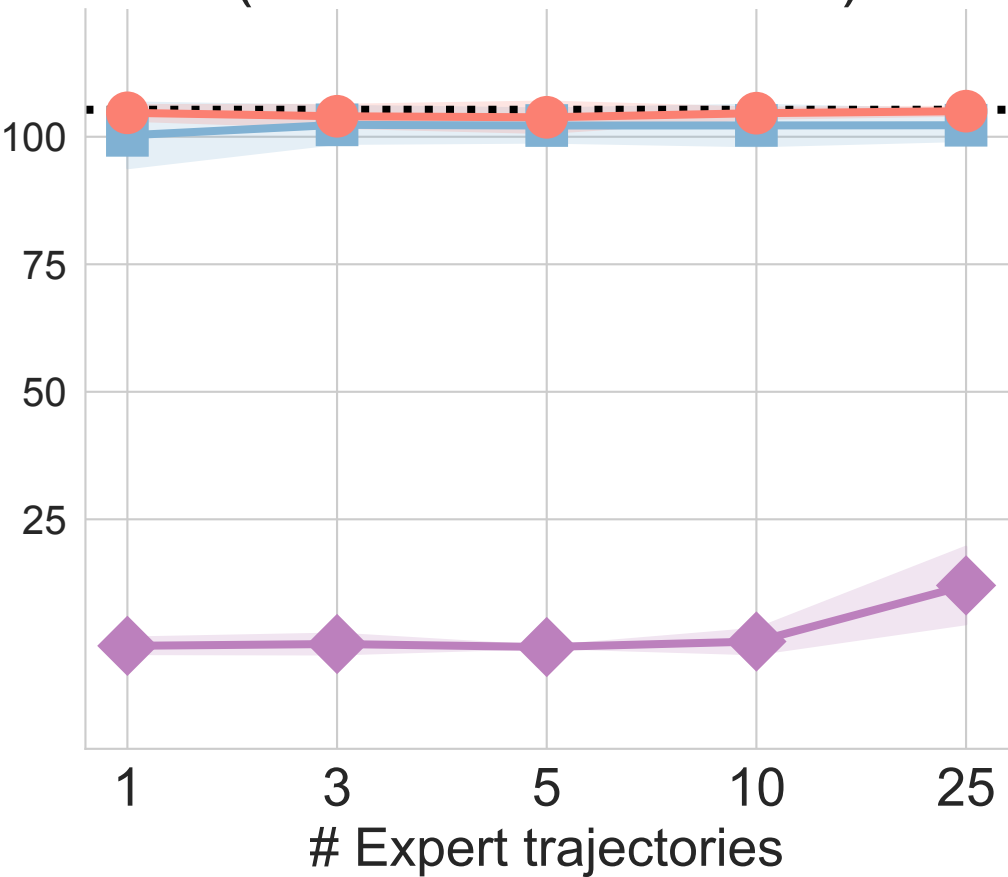

Supplement: supplementary_material [file increase_good_door_human_expert.pdf › Codes/Figure_code/figures/increase_good_door_human_expert.pdf]

# CHEETAH (MEDIUM + EXPERT)

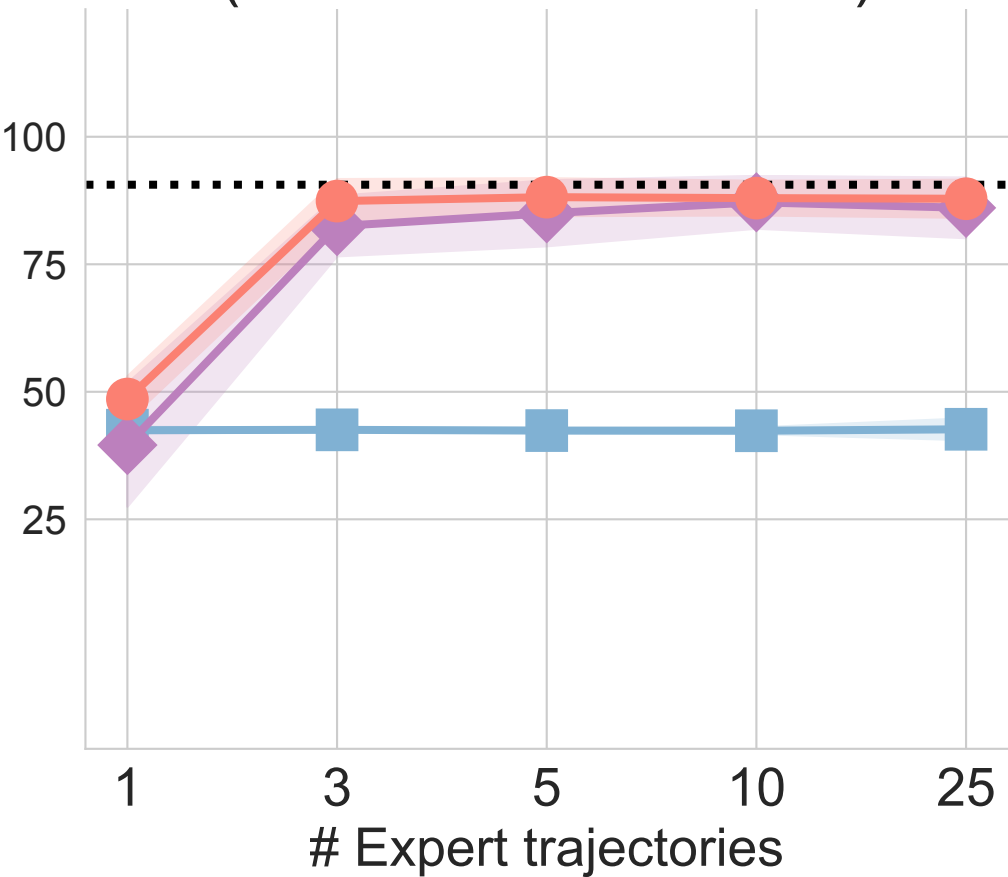

Supplement: supplementary_material [file increase_good_halfcheetah_medium_expert.pdf › Codes/Figure_code/figures/increase_good_halfcheetah_medium_expert.pdf]

# CHEETAH (RANDOM + EXPERT)

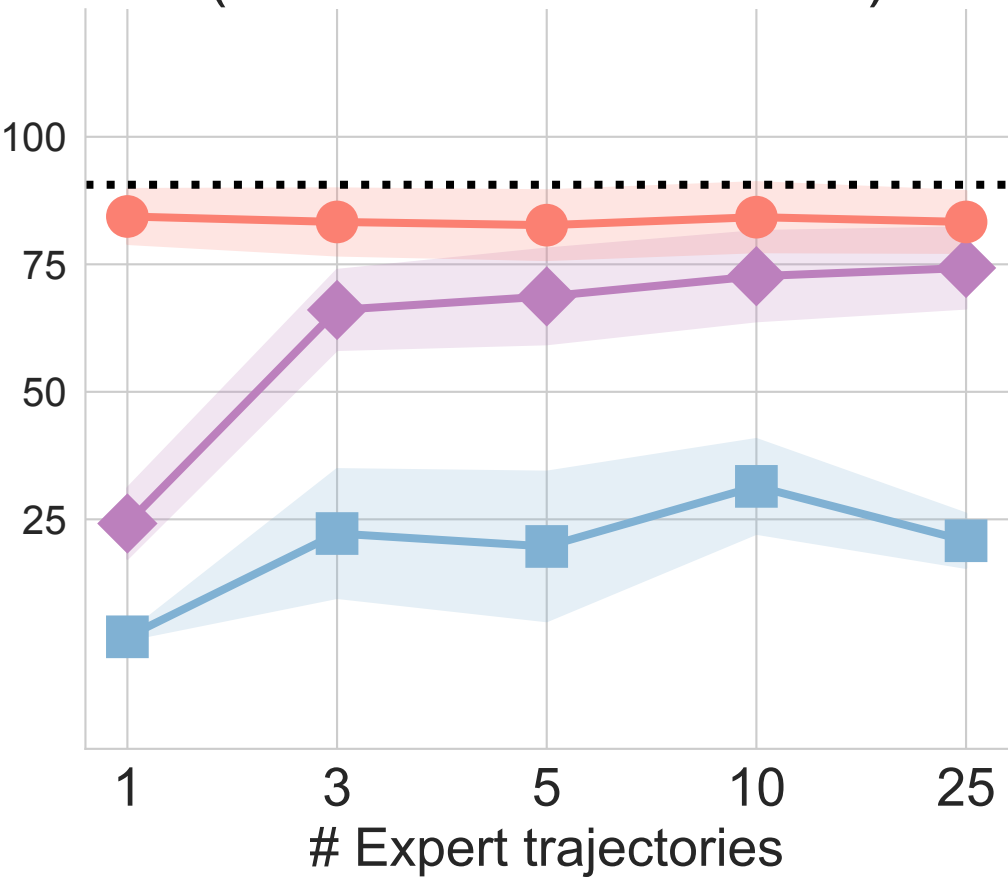

Supplement: supplementary_material [file increase_good_halfcheetah_random_expert.pdf › Codes/Figure_code/figures/increase_good_halfcheetah_random_expert.pdf]

# HAMMER (CLONED + EXPERT)

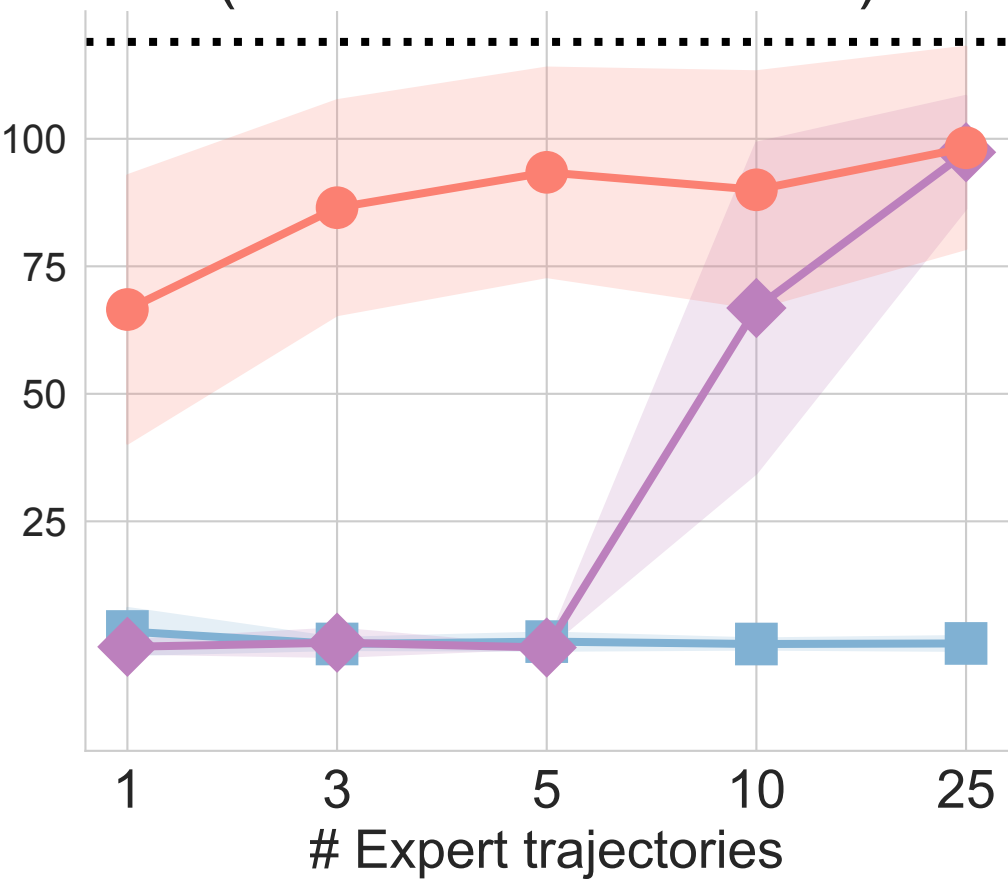

Supplement: supplementary_material [file increase_good_hammer_cloned_expert.pdf › Codes/Figure_code/figures/increase_good_hammer_cloned_expert.pdf]

# HAMMER (HUMAN + EXPERT)

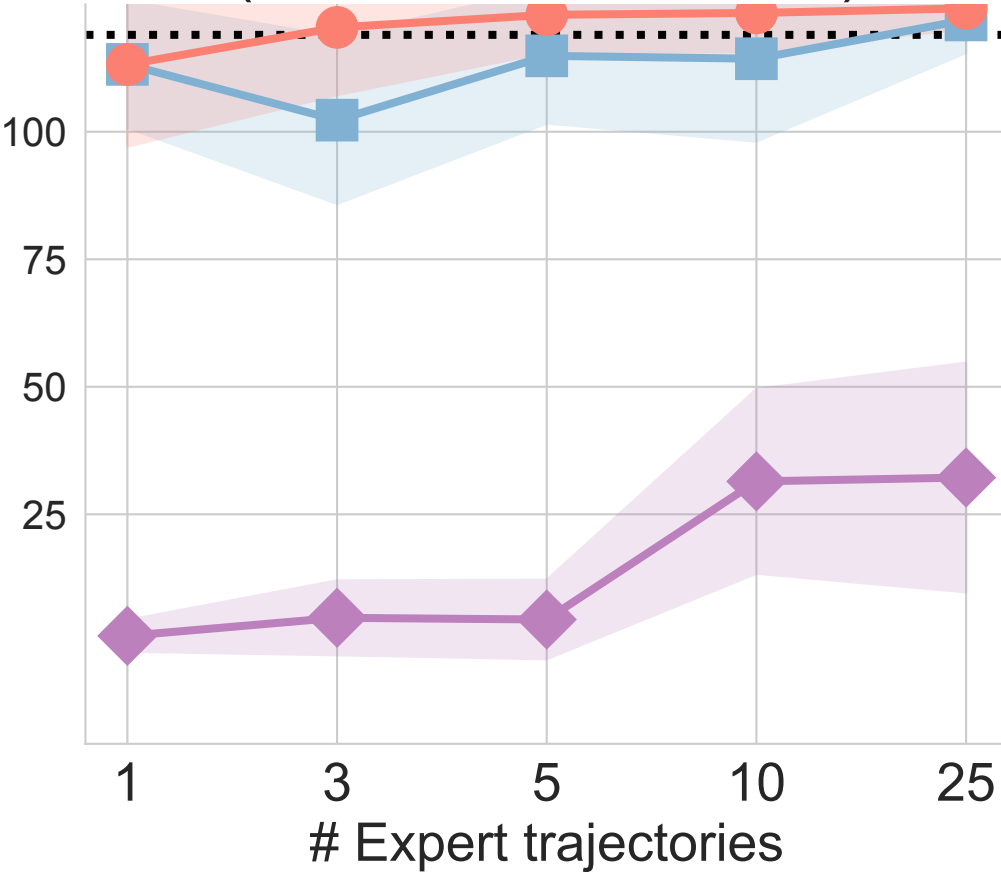

Supplement: supplementary_material [file increase_good_hammer_human_expert.pdf › Codes/Figure_code/figures/increase_good_hammer_human_expert.pdf]

# HOPPER (MEDIUM + EXPERT)

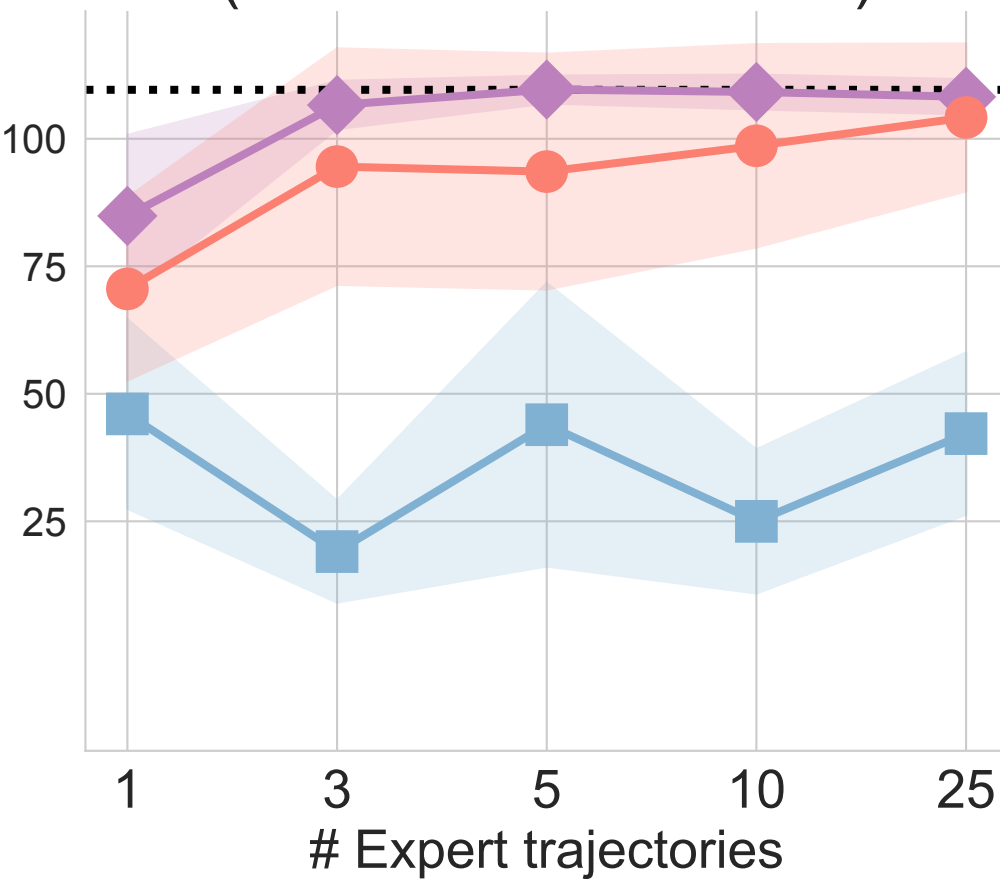

Supplement: supplementary_material [file increase_good_hopper_medium_expert.pdf › Codes/Figure_code/figures/increase_good_hopper_medium_expert.pdf]

# HOPPER (RANDOM + EXPERT)

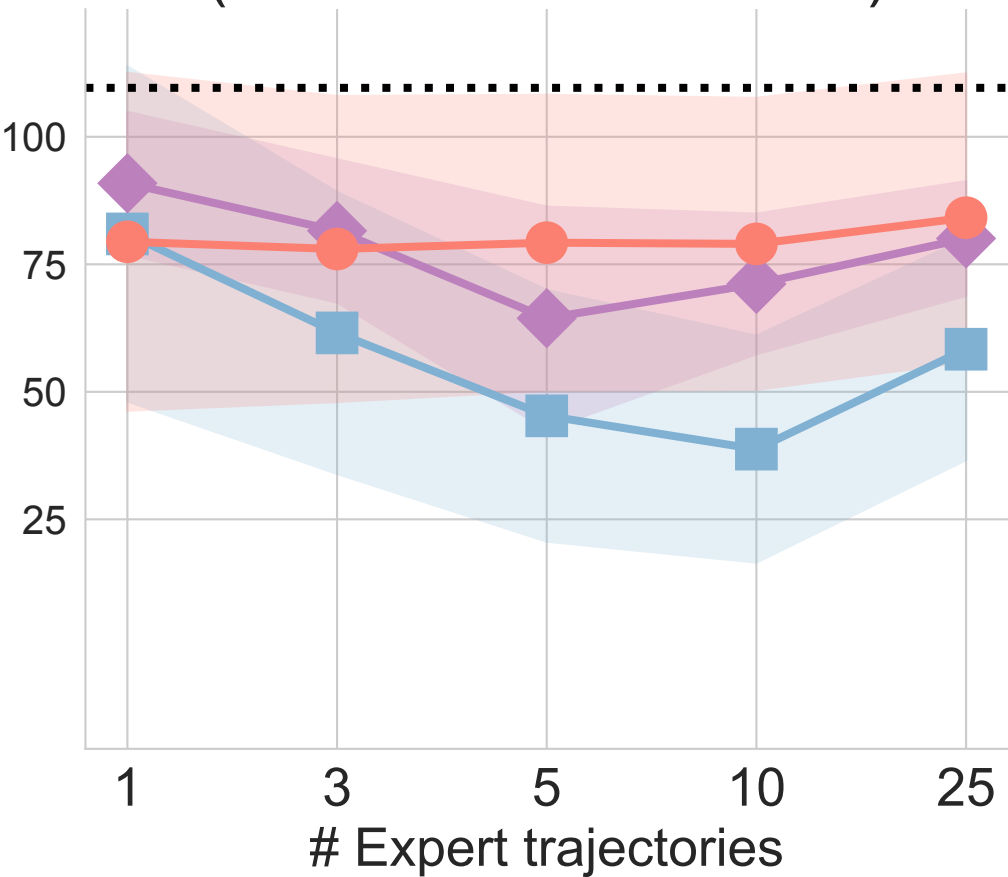

Supplement: supplementary_material [file increase_good_hopper_random_expert.pdf › Codes/Figure_code/figures/increase_good_hopper_random_expert.pdf]

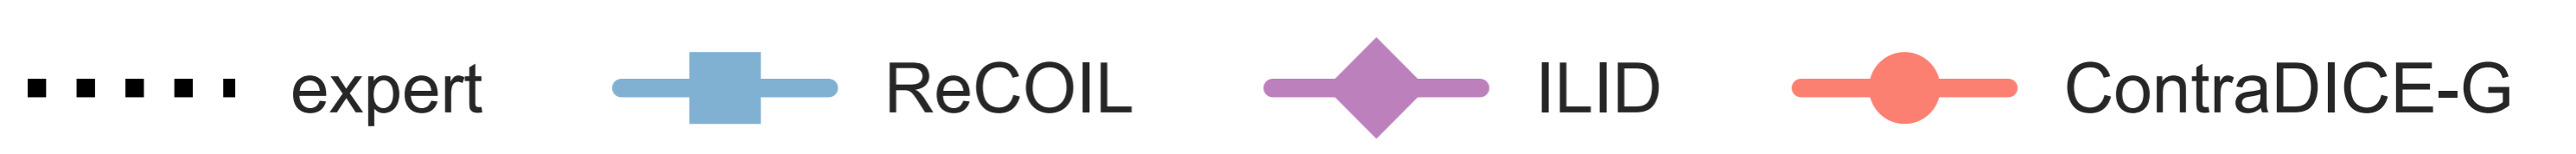

Supplement: supplementary_material [file increase_good_legend.pdf › Codes/Figure_code/figures/increase_good_legend.pdf]

# PEN (CLONED + EXPERT)

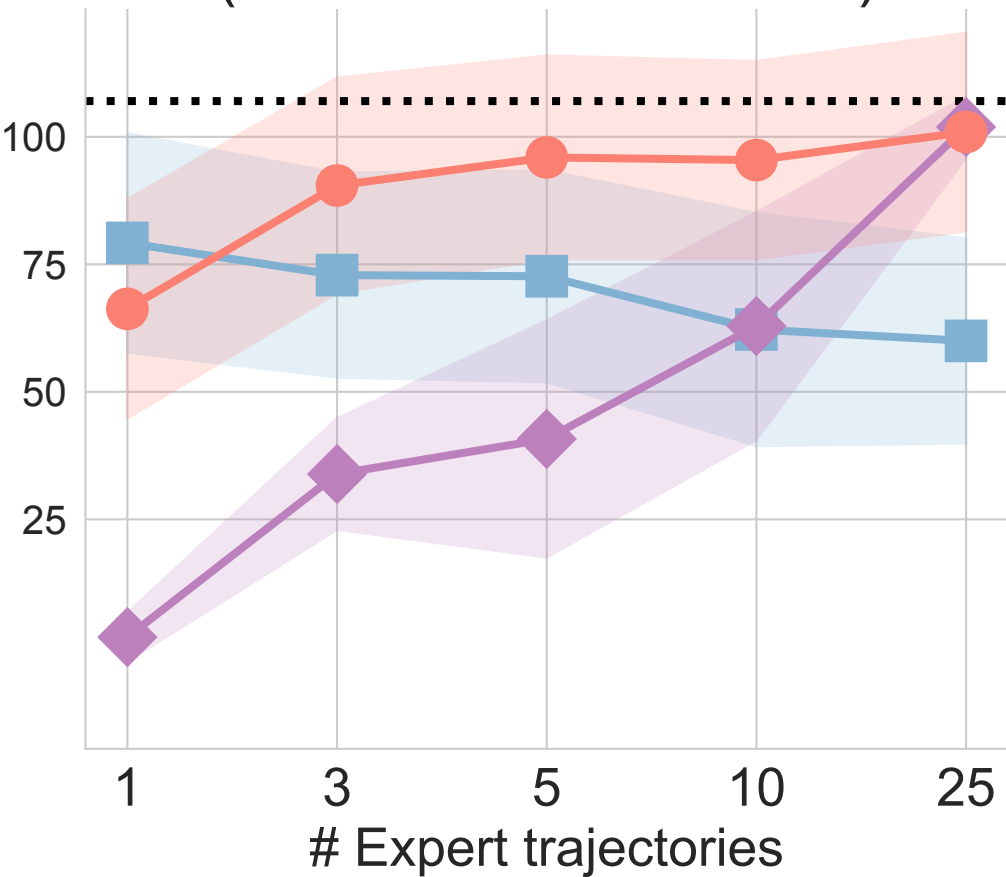

Supplement: supplementary_material [file increase_good_pen_cloned_expert.pdf › Codes/Figure_code/figures/increase_good_pen_cloned_expert.pdf]

# PEN (HUMAN + EXPERT)

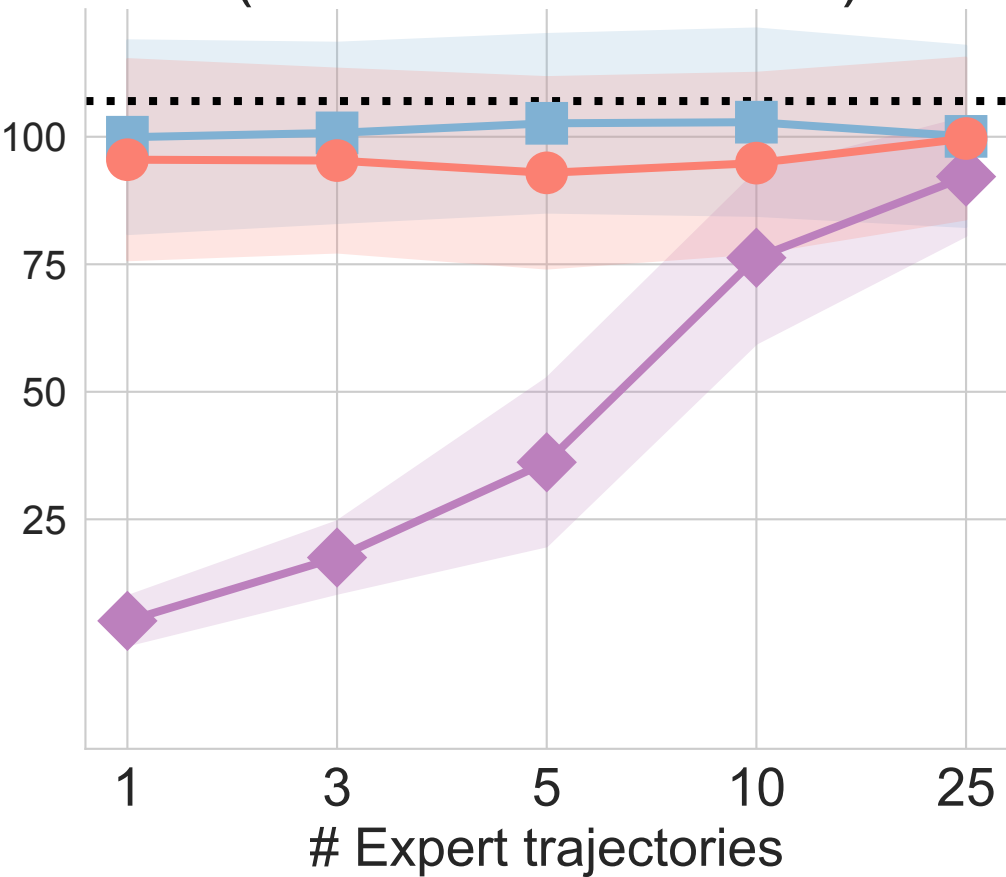

Supplement: supplementary_material [file increase_good_pen_human_expert.pdf › Codes/Figure_code/figures/increase_good_pen_human_expert.pdf]

# RELOCATE (CLONED + EXPERT)

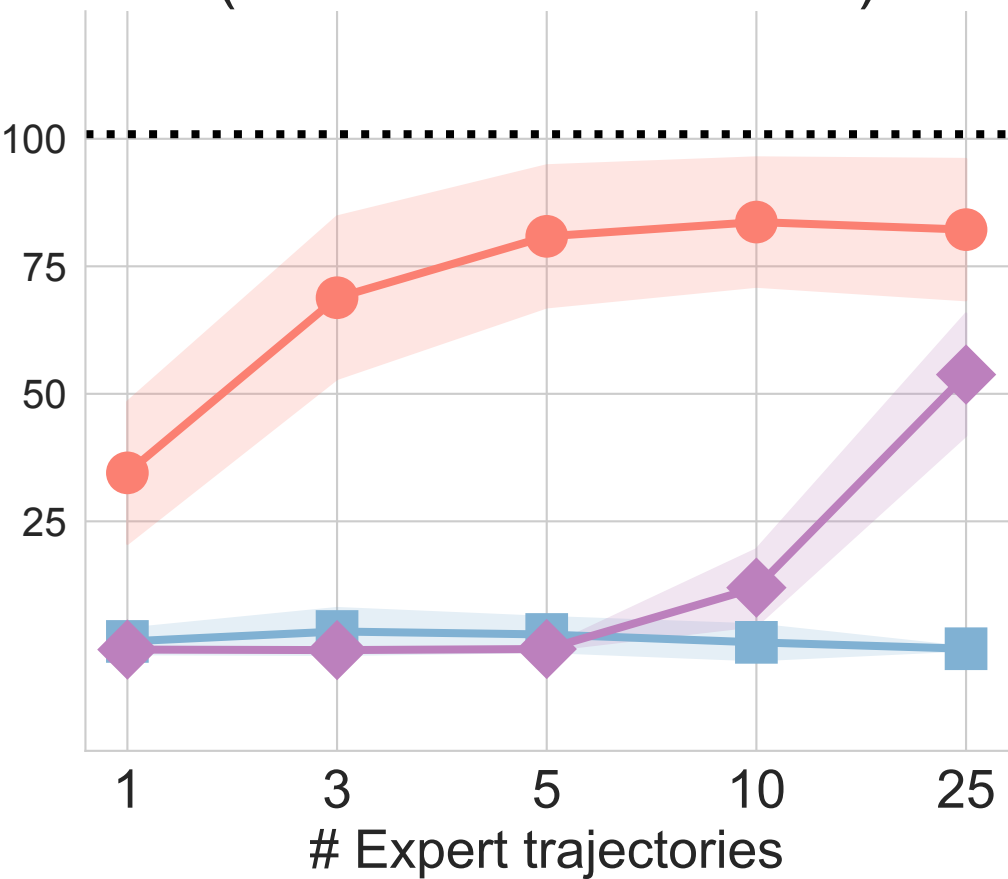

Supplement: supplementary_material [file increase_good_relocate_cloned_expert.pdf › Codes/Figure_code/figures/increase_good_relocate_cloned_expert.pdf]

# RELOCATE (HUMAN + EXPERT)

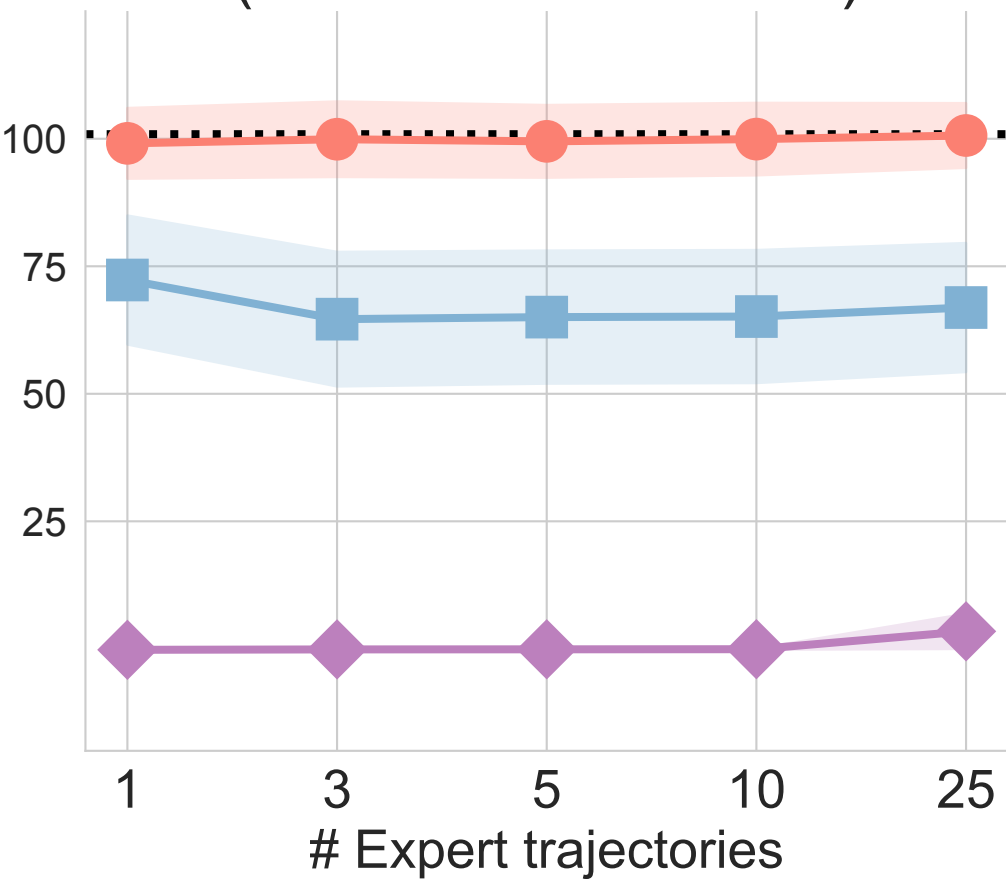

Supplement: supplementary_material [file increase_good_relocate_human_expert.pdf › Codes/Figure_code/figures/increase_good_relocate_human_expert.pdf]

# WALKER (MEDIUM + EXPERT)

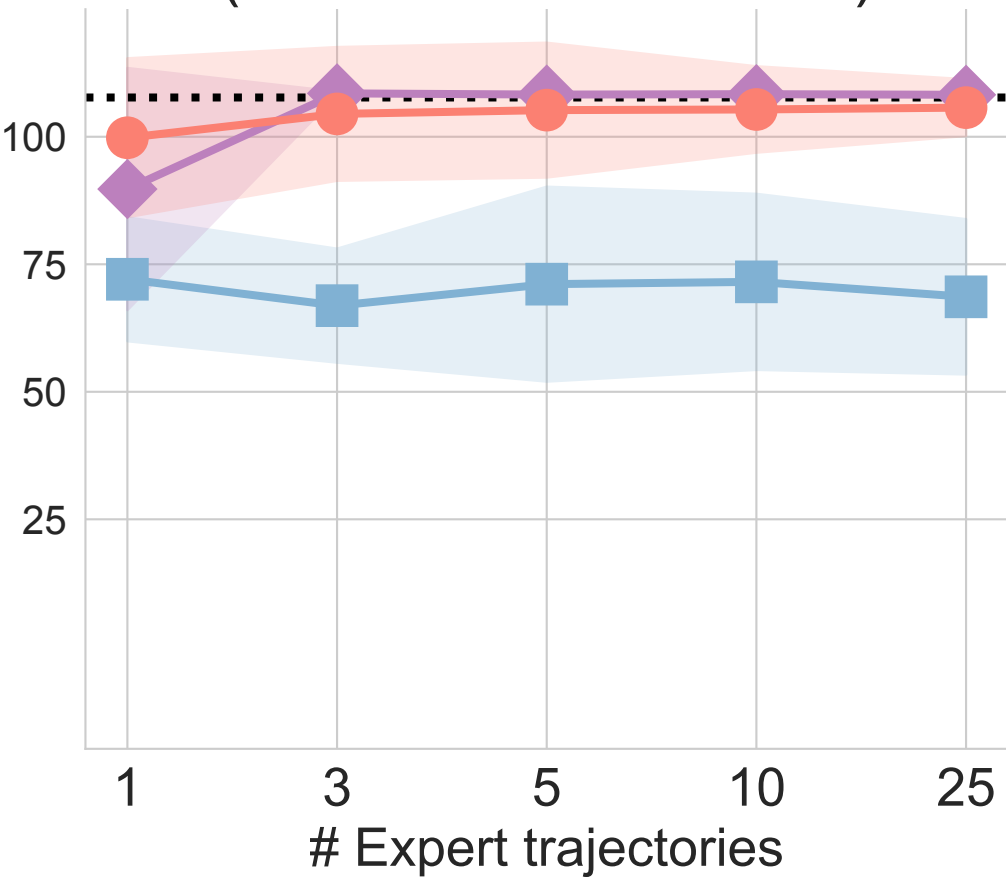

Supplement: supplementary_material [file increase_good_walker2d_medium_expert.pdf › Codes/Figure_code/figures/increase_good_walker2d_medium_expert.pdf]

# WALKER (RANDOM + EXPERT)

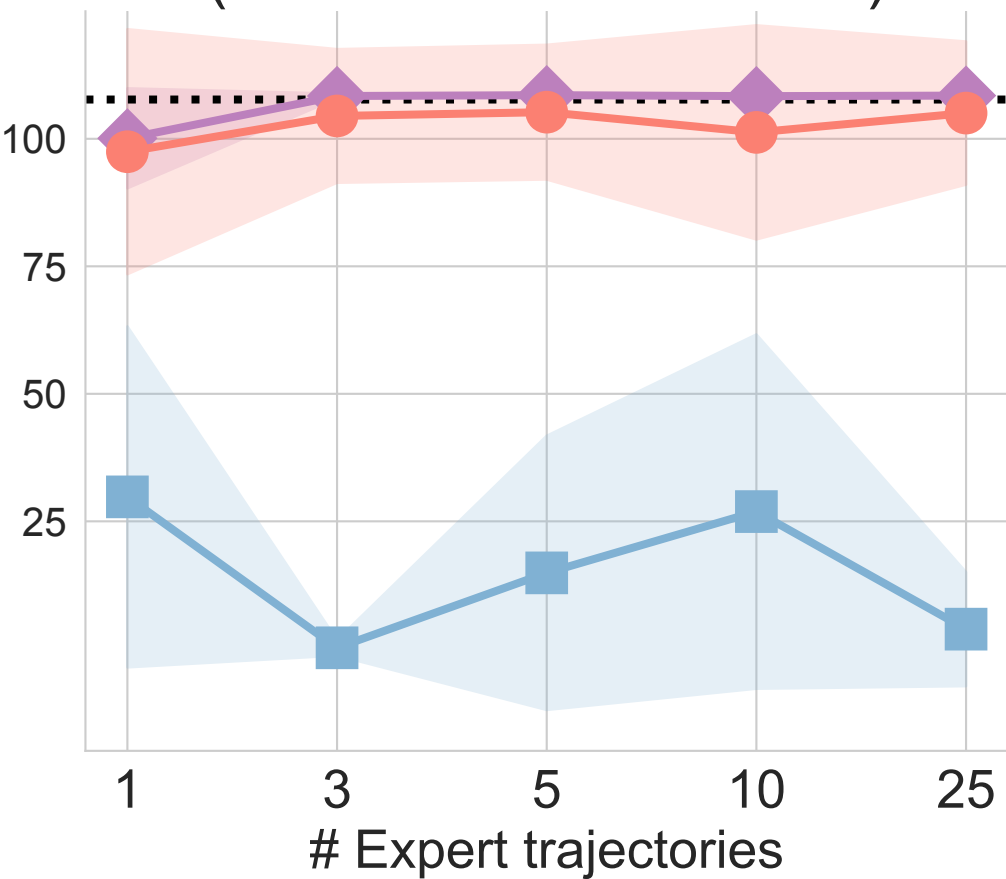

Supplement: supplementary_material [file increase_good_walker2d_random_expert.pdf › Codes/Figure_code/figures/increase_good_walker2d_random_expert.pdf]

# HAMMER (CLONED + EXPERT)

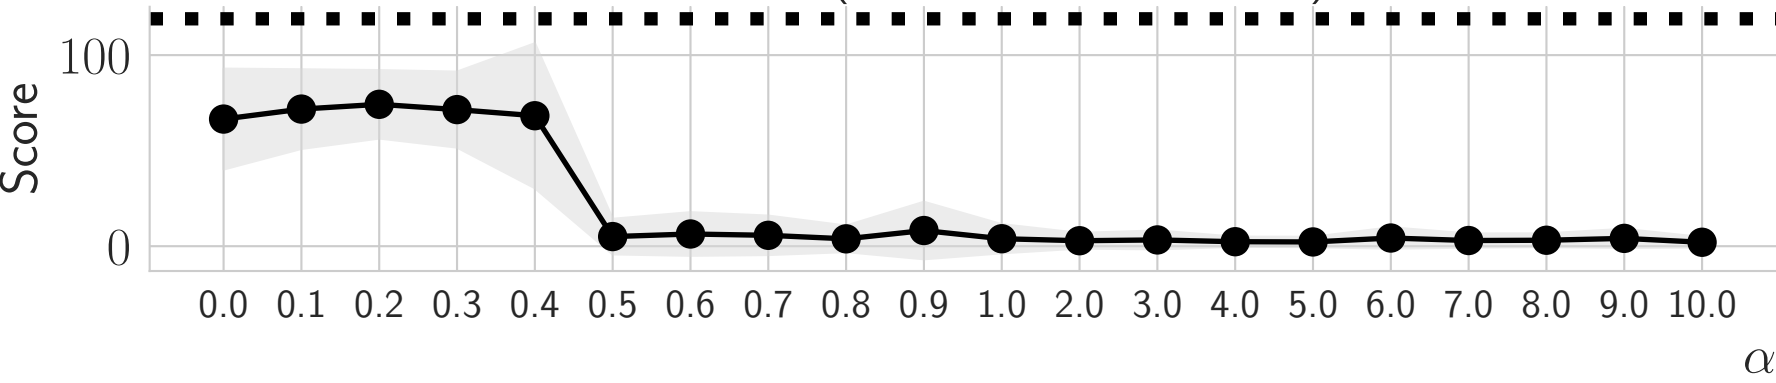

Supplement: supplementary_material [file large_alpha_ablation_study_hammer.pdf › Codes/Figure_code/figures/large_alpha_ablation_study_hammer.pdf]

HOPPER (RANDOM + EXPERT)

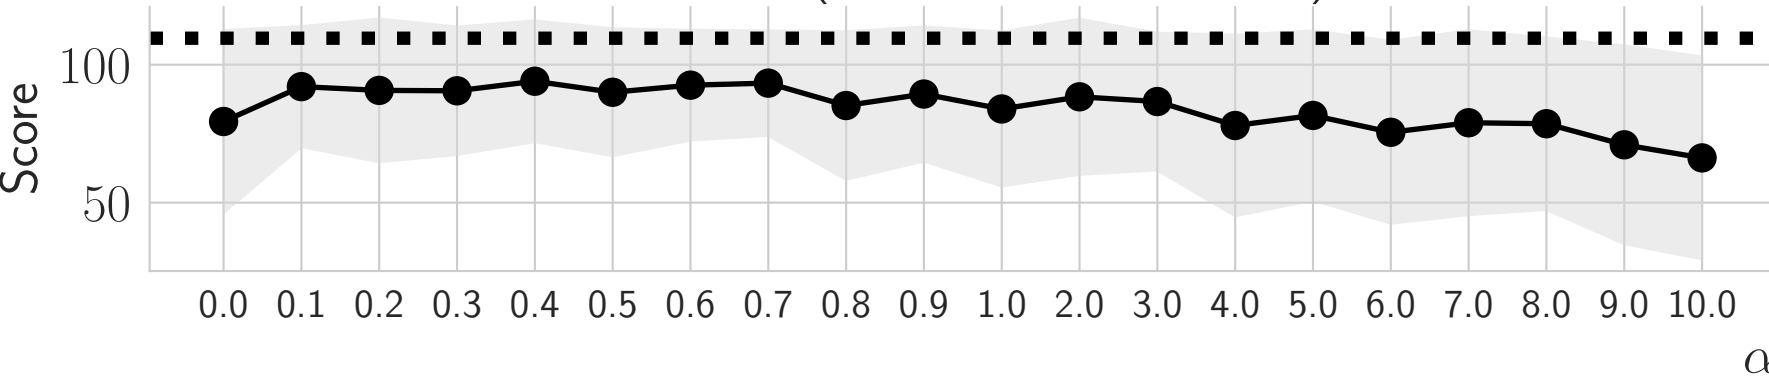

Supplement: supplementary_material [file large_alpha_ablation_study_hopper.pdf › Codes/Figure_code/figures/large_alpha_ablation_study_hopper.pdf]

# KITCHEN (PARTIAL + COMPLETE)

Score

75

50

25

0.0 0.1 0.2 0.3 0.4 0.5 0.6 0.7 0.8 0.9 1.0 2.0 3.0 4.0 5.0 6.0 7.0 8.0 9.0 10.0

$\alpha$

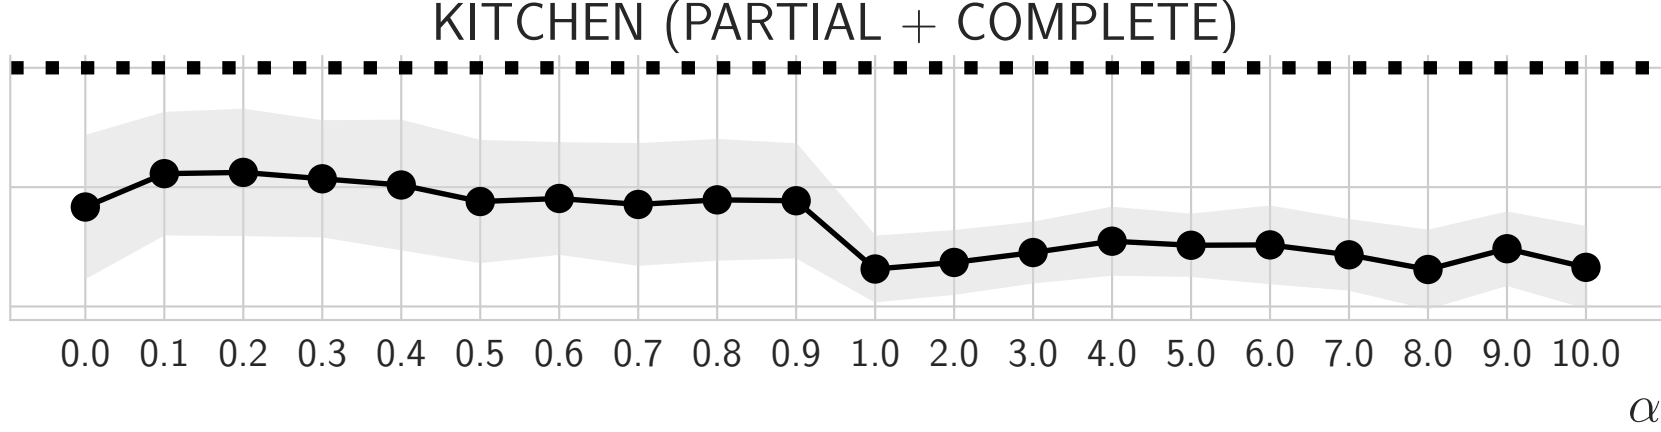

Supplement: supplementary_material [file large_alpha_ablation_study_kitchen.pdf › Codes/Figure_code/figures/large_alpha_ablation_study_kitchen.pdf]

# CHEETAH (MEDIUM + EXPERT)

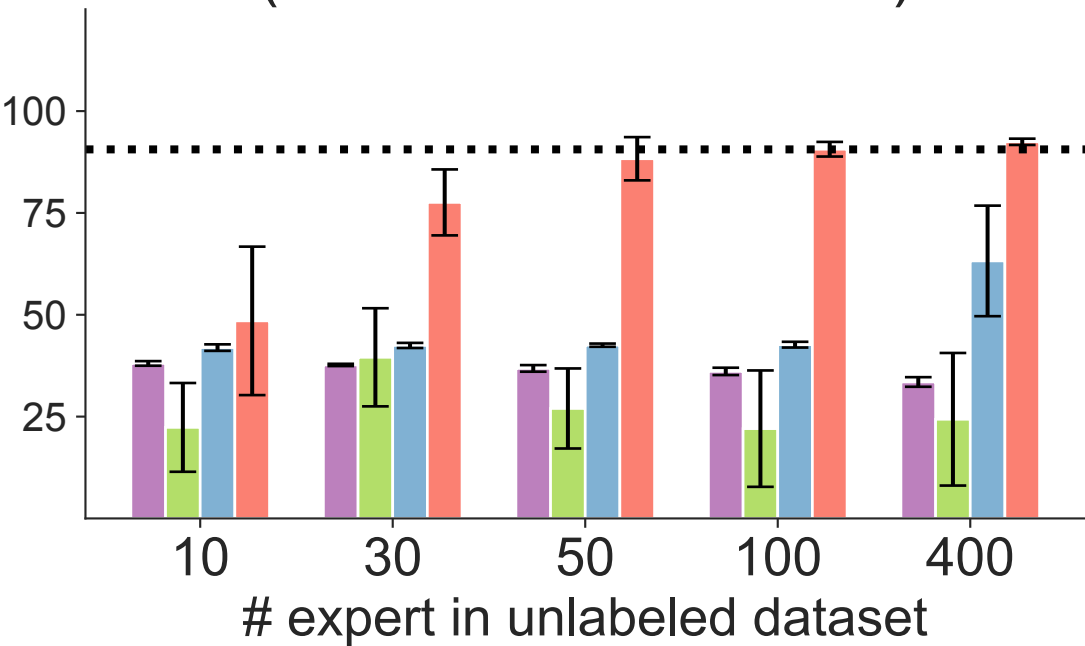

Supplement: supplementary_material [file unlabelled_quality_halfcheetah_medium_expert.pdf › Codes/Figure_code/figures/unlabelled_quality_halfcheetah_medium_expert.pdf]

# CHEETAH (RANDOM + EXPERT)

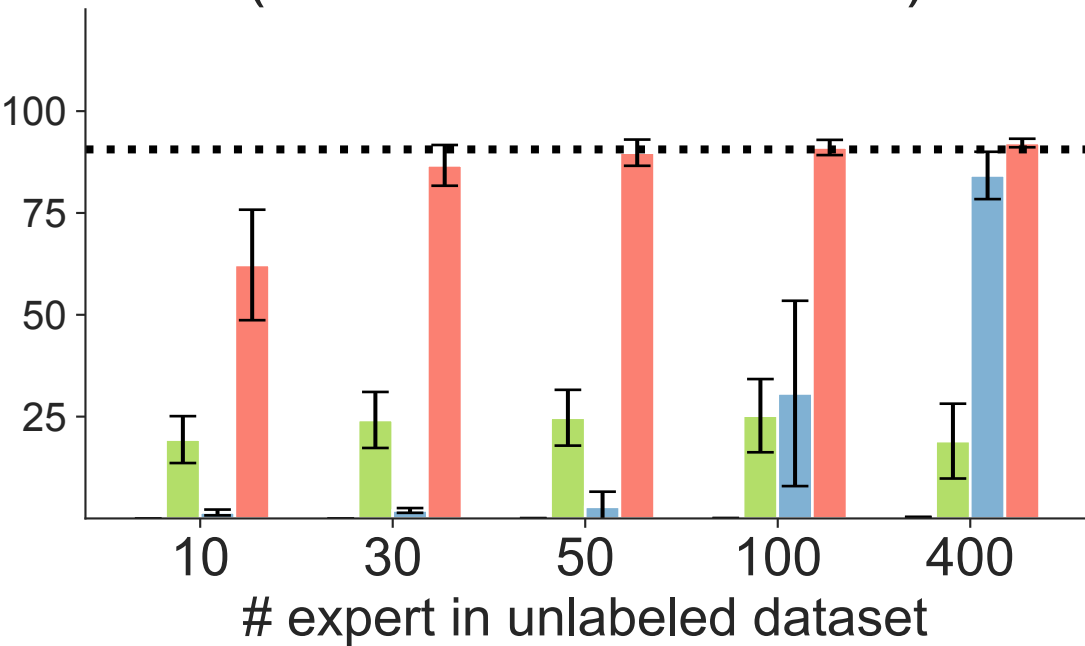

Supplement: supplementary_material [file unlabelled_quality_halfcheetah_random_expert.pdf › Codes/Figure_code/figures/unlabelled_quality_halfcheetah_random_expert.pdf]

# HAMMER (CLONED + EXPERT)

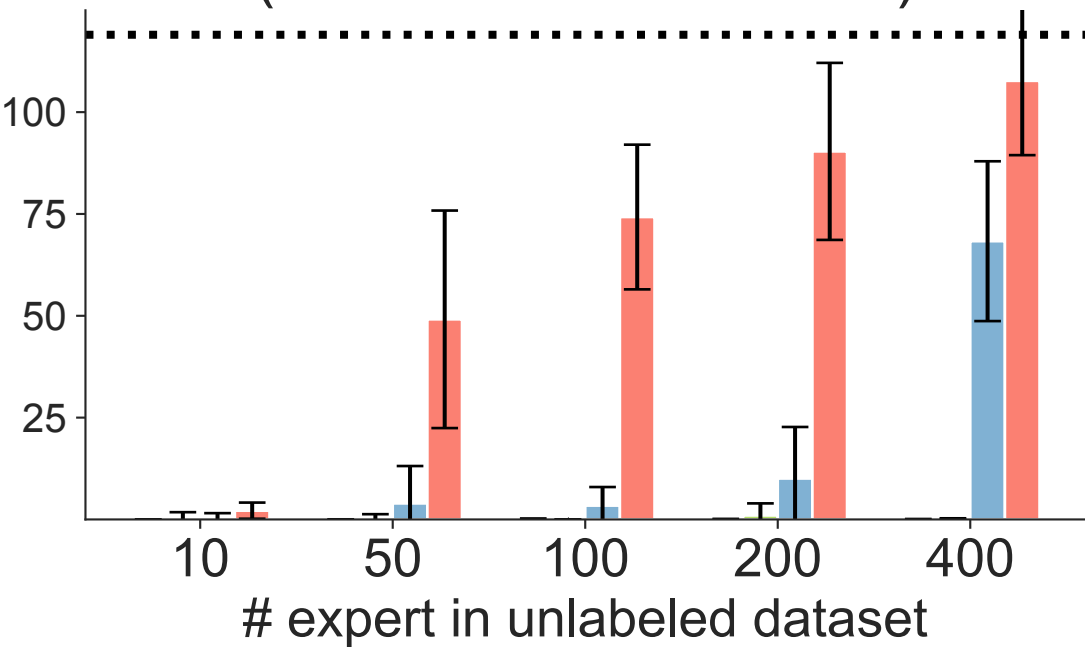

Supplement: supplementary_material [file unlabelled_quality_hammer_cloned_expert.pdf › Codes/Figure_code/figures/unlabelled_quality_hammer_cloned_expert.pdf]

# HAMMER (HUMAN + EXPERT)

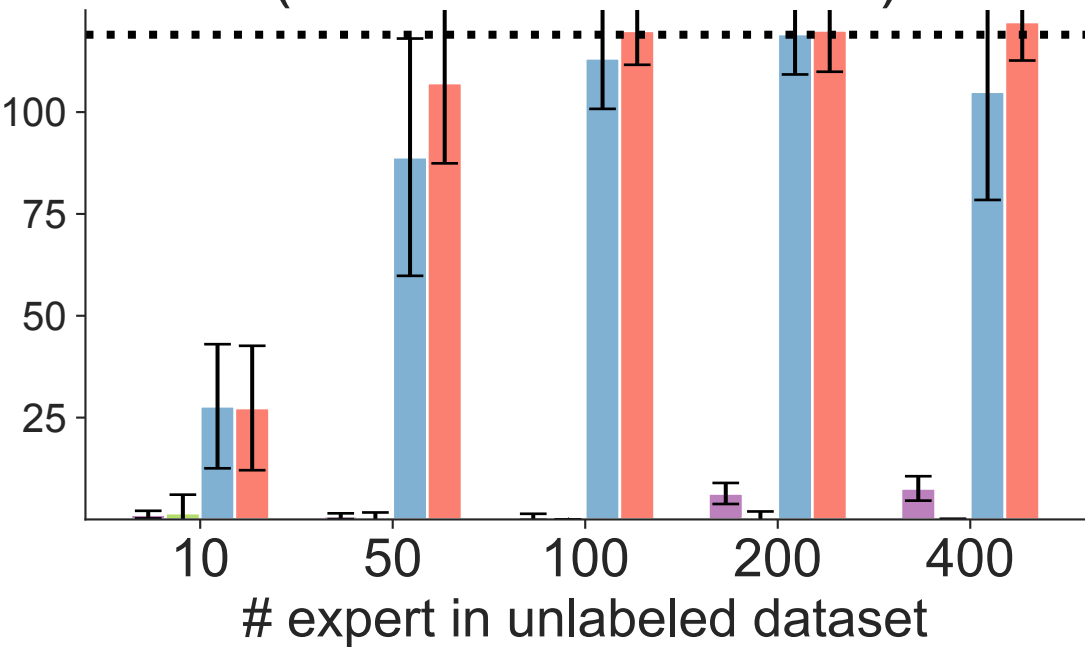

Supplement: supplementary_material [file unlabelled_quality_hammer_human_expert.pdf › Codes/Figure_code/figures/unlabelled_quality_hammer_human_expert.pdf]

# HOPPER (MEDIUM + EXPERT)

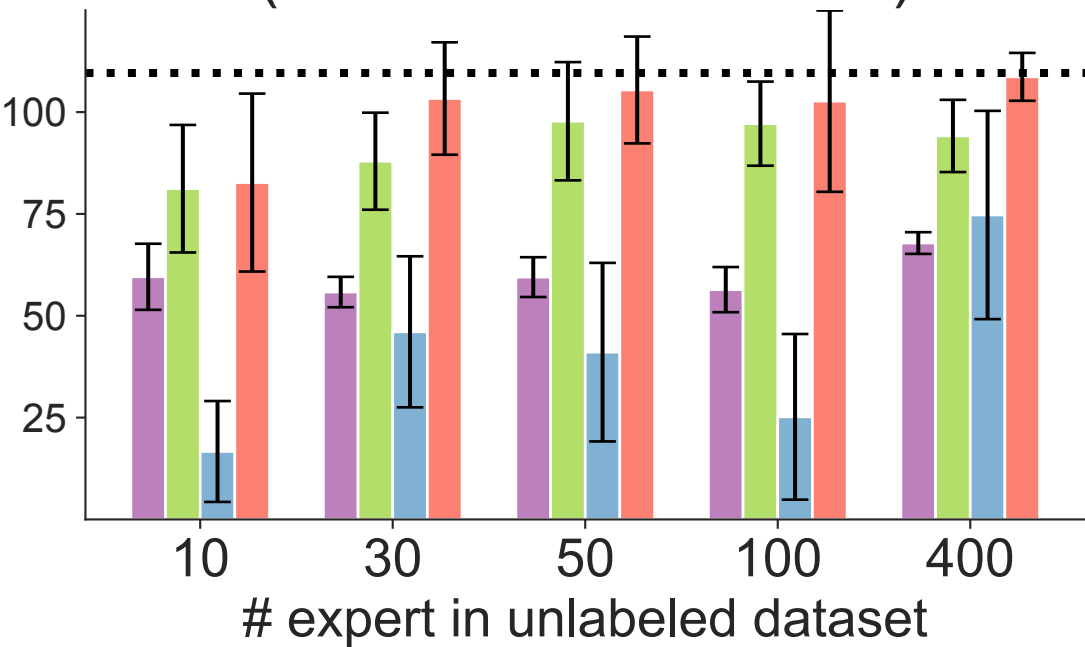

Supplement: supplementary_material [file unlabelled_quality_hopper_medium_expert.pdf › Codes/Figure_code/figures/unlabelled_quality_hopper_medium_expert.pdf]

# HOPPER (RANDOM + EXPERT)

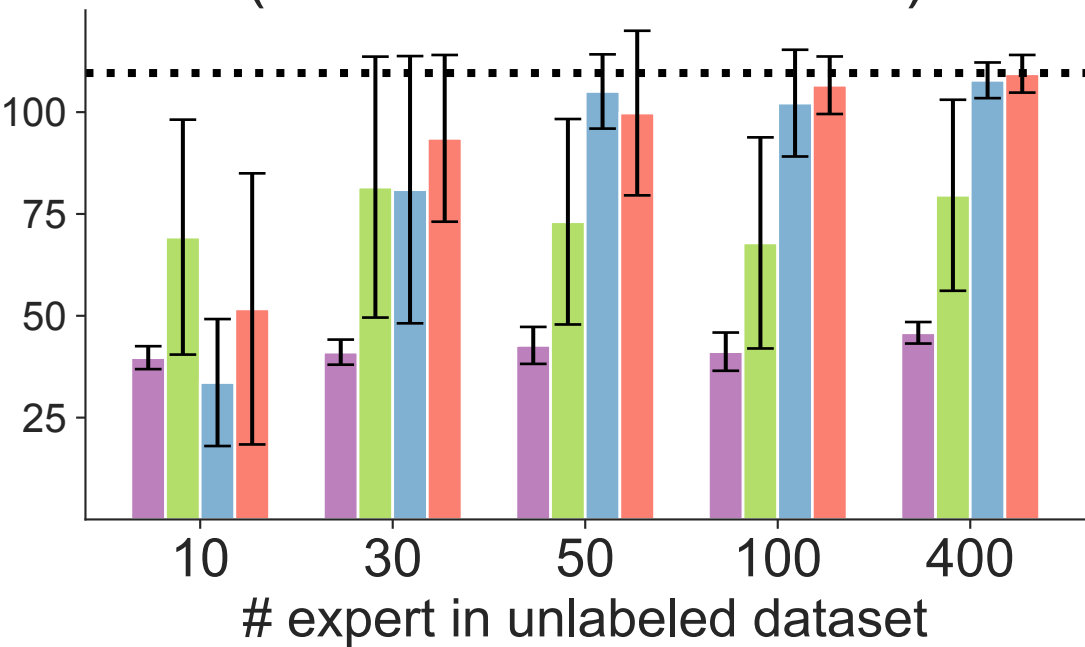

Supplement: supplementary_material [file unlabelled_quality_hopper_random_expert.pdf › Codes/Figure_code/figures/unlabelled_quality_hopper_random_expert.pdf]

# RELOCATE (CLONED + EXPERT)

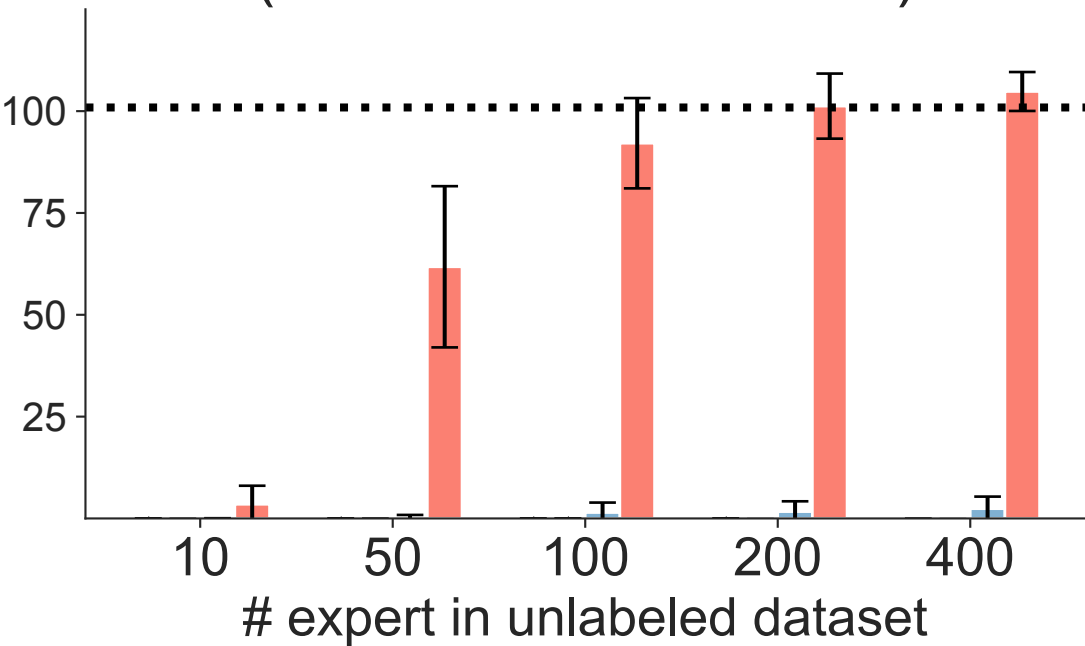

Supplement: supplementary_material [file unlabelled_quality_relocate_cloned_expert.pdf › Codes/Figure_code/figures/unlabelled_quality_relocate_cloned_expert.pdf]

# RELOCATE (HUMAN + EXPERT)

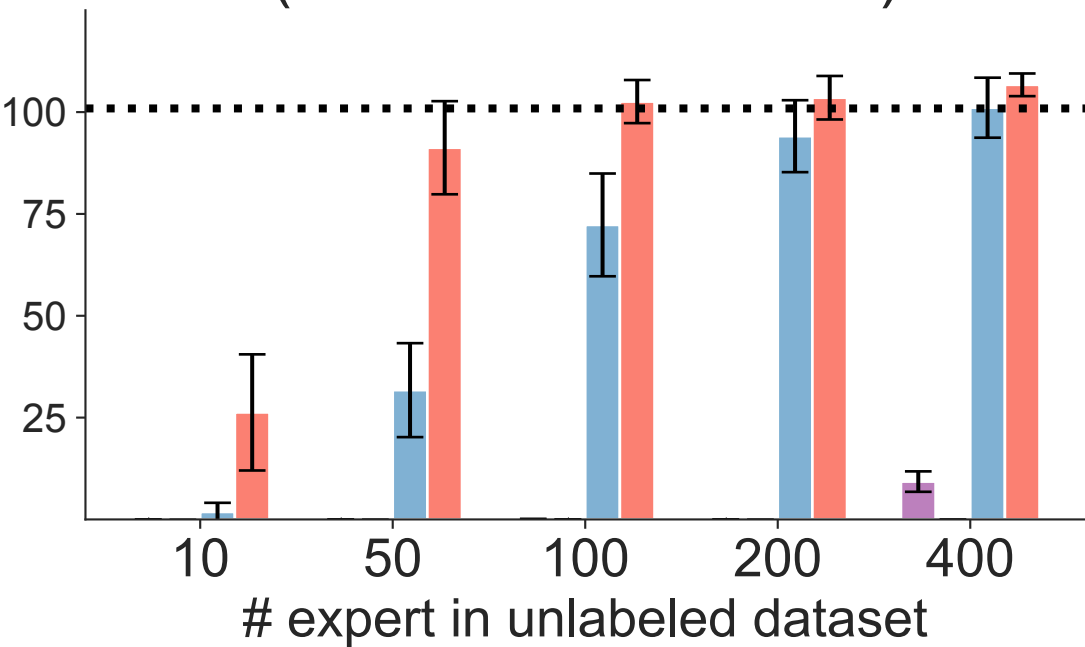

Supplement: supplementary_material [file unlabelled_quality_relocate_human_expert.pdf › Codes/Figure_code/figures/unlabelled_quality_relocate_human_expert.pdf]
